# Supplementary material for: Phylodynamics reveals the role of human travel and contact tracing in controlling the first wave of COVID-19 in four island nations
Source: bioRxiv or medRxiv preprint supplement (doi:10.1101/2020.08.04.20168518), 2021-02-24
Supplement: Supplementary file [file 2020.08.04.20168518-1.pdf]

# Phylodynamics reveals the role of human travel and contact tracing in controlling COVID-19 in four island nations

Jordan Douglas<sup>1,2,†,\*</sup>, Fábio K. Mendes<sup>1,2,3,†,\*</sup>, Remco Bouckaert<sup>1,2</sup>,  
Dong Xie<sup>1,2</sup>, Cinthy L. Jiménez-Silva<sup>1,3</sup>, Christiaan Swanepoel<sup>1,2</sup>,  
Joep de Ligt<sup>4</sup>, Xiaoyun Ren<sup>4</sup>, Matt Storey<sup>4</sup>, James Hadfield<sup>5</sup>, Colin R. Simpson<sup>6</sup>,  
Jemma L. Geoghegan<sup>4,7</sup>, David Welch<sup>1,2</sup> and Alexei J. Drummond<sup>1,2,3</sup>

<sup>1</sup>Centre for Computational Evolution, The University of Auckland, Auckland, New Zealand

<sup>2</sup>School of Computer Science, The University of Auckland, Auckland, New Zealand

<sup>3</sup>School of Biological Sciences, The University of Auckland, Auckland, New Zealand

<sup>4</sup>Institute of Environmental Science and Research, Wellington, New Zealand.

<sup>5</sup>Vaccine and Infectious Disease Division, Fred Hutchinson Cancer Research Center,  
Seattle, WA, USA

<sup>6</sup>School of Health, Victoria University of Wellington, Wellington, New Zealand

<sup>7</sup>Department of Microbiology and Immunology, University of Otago, Dunedin, New Zealand

<sup>†</sup>To whom correspondence should be addressed; Email:  
jordan.douglas@auckland.ac.nz, f.mendes@auckland.ac.nz.

\*Authors contributed equally to this work.

## SUPPORTING INFORMATION

# Contents

|          |                                                                    |           |
|----------|--------------------------------------------------------------------|-----------|
| <b>1</b> | <b>Viral genomic sequencing</b>                                    | <b>5</b>  |
| <b>2</b> | <b>Sequence preprocessing</b>                                      | <b>6</b>  |
| 2.1      | Filtering . . . . .                                                | 6         |
| 2.2      | Subsampling . . . . .                                              | 6         |
| 2.3      | Alignment . . . . .                                                | 7         |
| <b>3</b> | <b>Demes and epochs</b>                                            | <b>8</b>  |
| 3.1      | A model of human movement decrease for mobile phone data . . . . . | 9         |
| <b>4</b> | <b>Model definition</b>                                            | <b>13</b> |
| 4.1      | Substitution and clock models . . . . .                            | 13        |
| 4.1.1    | Partition schemes and substitution model selection . . . . .       | 13        |
| 4.2      | Phylogenetic models . . . . .                                      | 13        |
| 4.2.1    | Discrete phylogeography (DPG) . . . . .                            | 13        |
| 4.2.2    | Two epoch discrete phylogeography (DPG2) . . . . .                 | 14        |
| 4.2.3    | Structured coalescent (SC) . . . . .                               | 15        |
| 4.2.4    | Multi-type birth-death (MTBD) . . . . .                            | 15        |
| 4.3      | Prior distributions . . . . .                                      | 16        |
| 4.3.1    | Prior for origin time . . . . .                                    | 16        |
| 4.3.2    | Priors for sampling proportion $s$ . . . . .                       | 17        |
| 4.3.3    | Priors for MTBD geographical frequencies $\pi_G$ . . . . .         | 18        |
| <b>5</b> | <b>Model implementation and parameter inference</b>                | <b>21</b> |
| <b>6</b> | <b>Supplementary results</b>                                       | <b>25</b> |
| 6.1      | Parameter estimates . . . . .                                      | 25        |
| 6.2      | Introductions through time . . . . .                               | 25        |

## List of Figures

|     |                                                                                  |    |
|-----|----------------------------------------------------------------------------------|----|
| S1  | Cell phone mobility data . . . . .                                               | 10 |
| S2  | Full MTBD probabilistic graphical model . . . . .                                | 15 |
| S3  | Graphical summary of prior distributions . . . . .                               | 20 |
| S4  | Clade posterior convergence . . . . .                                            | 24 |
| S5  | Posterior distribution of $b$ over time . . . . .                                | 26 |
| S6  | Posterior distribution of $s$ over time . . . . .                                | 27 |
| S7  | Posterior distribution of $\lambda$ over time . . . . .                          | 28 |
| S8  | Posterior distribution of $\psi$ over time . . . . .                             | 29 |
| S9  | Posterior distribution of $\mu$ over time . . . . .                              | 30 |
| S10 | Comparison of mean root height and clock rate estimates . . . . .                | 31 |
| S11 | Comparison of the four subsampling methods for New Zealand alignments . . . . .  | 32 |
| S12 | Comparison of the four subsampling methods for Australia alignments . . . . .    | 33 |
| S13 | Comparison of the four subsampling methods for Iceland alignments . . . . .      | 34 |
| S14 | Comparison of the four subsampling methods for Taiwan alignments . . . . .       | 35 |
| S15 | Comparison of subsampling methods on SARS-CoV-2 introductions over time. . . . . | 36 |

## List of Tables

|     |                                                                       |    |
|-----|-----------------------------------------------------------------------|----|
| S1  | Sequencing protocols. . . . .                                         | 5  |
| S2  | Summary of alignments . . . . .                                       | 7  |
| S3  | Summary of the COVID-19 pandemic in the four target islands . . . . . | 8  |
| S4  | Epochs used in MTBD . . . . .                                         | 9  |
| S5  | Parameters of sigmoid model for human movement . . . . .              | 12 |
| S6  | Date boundaries of mobility reduction . . . . .                       | 12 |
| S7  | Summary of prior distributions . . . . .                              | 16 |
| S8  | Prior distributions for $s$ . . . . .                                 | 18 |
| S9  | Prior distributions for $\pi_G$ . . . . .                             | 19 |
| S10 | Priors for $m$ under SC . . . . .                                     | 19 |
| S11 | Effective sample sizes under the MTBD model . . . . .                 | 21 |
| S12 | Effective sample sizes under the SC model . . . . .                   | 22 |
| S13 | Effective sample sizes under the DPG model . . . . .                  | 22 |
| S14 | Effective sample sizes under the DPG2 model . . . . .                 | 23 |
| S15 | Estimated number of imports and exports (“small-time”) . . . . .      | 37 |
| S16 | Estimated number of imports and exports (“large-time”) . . . . .      | 38 |
| S17 | Estimated number of imports and exports (“small-active”) . . . . .    | 39 |
| S18 | Estimated number of imports and exports (“large-active”) . . . . .    | 40 |

## 1 Viral genomic sequencing

RNA from 217 confirmed COVID-19 cases in New Zealand were obtained from diagnostic laboratories around the country. Viral RNA is reverse transcribed with SSIV with random hexamers, and then amplified using multiple overlapping PCR reactions spanning the viral genome, by employing Q5 HotStart High-Fidelity DNA Polymerase. Two primer schemes were used in this study: 1) ARTIC network protocol (V1 and V3) and 2) the New South Wales (NSW) primer set described in Eden et al. (2020). Samples processed with the ARTIC protocol were sequenced on R9.4.1 MinION flow cells using the Oxford NanoPore ligation sequencing protocol (Loman et al., 2020). Sample processed with the NSW primer set were sequenced on Illumina NextSeq and MiSeq flowcells in paired-end 300 cycle format using the Nextera-Xt library protocol. Table S1 describes the number of genomes processed using each protocol.

**Table S1:** Sequencing protocols used to sequence the 217 New Zealand SARS-CoV-2 genomes.

| Protocol | Technology      | Number of genomes |
|----------|-----------------|-------------------|
| ARTIC V1 | Oxford Nanopore | 9                 |
| ARTIC V3 | Oxford Nanopore | 86                |
| NSW      | Illumina        | 122               |

For both methods, alignment to the reference genome MN908947.3 was followed by consensus calling for the major alleles on variation sites. Regions are masked with *N*'s in the final genome when amplicon failed to reach sufficient depth. Genomes with fewer than 3000 *N*'s in their consensus genome were used in the analysis presented here. The nanopore reads generated with Nanopore sequencing of ARTIC primer sets (V1 and V3) were mapped and assembled using the ARTIC bioinformatics pipeline (v1.1.0; Loman et al. 2020) with the “-medaka” flag enabled in the minion step. For the NSW primer set, raw reads were quality and adapter trimmed using `trimmomatic` (v0.36; Bolger et al. 2014) with the following settings: removing first 15 and last 20 bases of each read, minimum trailing quality of 30, 4nt-moving average quality of 25, and length  $\geq 100$ bps.

Trimmed paired reads were mapped to reference using `bwa`. Primer sequences were masked using `iVar` (v1.2; Grubaugh et al. 2019). Duplicated reads were marked using `Picard` (v2.10.10; <http://broadinstitute.github.io/picard/>) and not used for SNP calling or depth calculation. Single nucleotide polymorphisms (SNPs) were called using `bcftools mpileup` (v1.9; <http://samtools.github.io/bcftools/>). SNPs within genomic regions amplified by each primer sets and primer regions were called separately. SNPs were quality trimmed using `vcffilter` (`vcflib` v1.0.0; Garrison 2014) requiring 20x depth and overall quality of 30. Positions that are less than 20x were masked as *N* in the final consensus genome. In addition, positions with an alternative allele frequency between 20 and 79% were also masked as *N*.

## 2 Sequence preprocessing

### 2.1 Filtering

Viral genomic sequences were filtered by observing the following constraints:

1. All viral sequences must have a human host;
2. All sequences must have date resolution down to the day of the month;
3. All sequences be more than 25 kb in length;
4. The proportion of ambiguous sites in a sequence must be less than 0.005 (approximately 150 sites) (due to a shortage in sequences, samples from New Zealand and Taiwan are exempt from this constraint);
5. Sequences on the “NextStrain CoV exclude list” (Hadfield et al., 2018); URL: <https://github.com/nextstrain/ncov/blob/master/defaults/exclude.txt>) are excluded from the analysis. This list contains sequences which were identified as problematic either through manual inspection, or due to the sample falling outside 4 interquartile ranges from the mean root-to-tip distance (calculated using TreeTime; Sagulenko et al. 2018).

### 2.2 Subsampling

Because analysing all available genomic data using our Bayesian model is prohibitively slow, subsampling the full dataset is necessary. We assess four subsampling schemes producing one alignment each, differing with respect to (i) dataset size  $n$  (either “small” or “large”), and (ii) the method used to select sequences (either “time” or “active”). In (i), the rest-of-the-world deme ( $\mathcal{RW}$ ) contributes 200 or 500 sequences to the “small” and “large” datasets, respectively. Out of these sequences, 40 (for “small”) or 80 (for “large”) always come from China for the phylogenetic signal they carry with respect to the root of the infection tree. The island deme ( $\mathcal{IS}$ ) then contributes the remaining sequences to  $n$ , up to a maximum of 250. Specifically, Australia contributes 250 sequences, Iceland 250, New Zealand 217, and Taiwan 76 (see more details on our deme definitions below). In (ii), the method consists of either (a) randomly choosing one sequence from each of  $n$  dates sampled with replacement (i.e., picking uniformly through time; the “time” method), or (b) sampling (with replacement)  $n$  country-date pairs proportionally to the number of active cases reported in that country on that date (according to <https://www.worldometers.info/coronavirus/>), with one sequence chosen randomly from each pair (the “active” method).

## 2.3 Alignment

After filtering and subsampling sequences, alignments are generated using MAFFT under its default settings (Katoh et al., 2009), yielding a total of 16 alignments (four alignments per geographical model).

**Table S2:** Taxa count  $N$ , alignment length  $L$ , and A, C, G, T, and ambiguous (?) content are reported for each alignment used in this study.

| Island      | Alignment    | $N$ | $L$ (kb) | A (%) | C (%) | G (%) | T (%) | ? (%) |
|-------------|--------------|-----|----------|-------|-------|-------|-------|-------|
| Australia   | Small-time   | 450 | 30       | 29.7  | 18.3  | 19.5  | 32    | 0.1   |
| Australia   | Small-active | 450 | 30       | 29.7  | 18.3  | 19.5  | 32    | 0.1   |
| Australia   | Large-time   | 750 | 30       | 29.7  | 18.3  | 19.5  | 31.9  | 0.1   |
| Australia   | Large-active | 750 | 30       | 29.7  | 18.2  | 19.5  | 31.9  | 0.1   |
| Iceland     | Small-time   | 450 | 30       | 29.7  | 18.3  | 19.5  | 32    | 0.2   |
| Iceland     | Small-active | 450 | 30       | 29.7  | 18.3  | 19.5  | 32    | 0.2   |
| Iceland     | Large-time   | 750 | 30       | 29.7  | 18.2  | 19.5  | 31.9  | 0.2   |
| Iceland     | Large-active | 750 | 30       | 29.7  | 18.3  | 19.5  | 32    | 0.1   |
| New Zealand | Small-time   | 417 | 30       | 29.5  | 18.1  | 19.4  | 31.7  | 0.9   |
| New Zealand | Small-active | 417 | 30       | 29.5  | 18.2  | 19.4  | 31.8  | 0.8   |
| New Zealand | Large-time   | 717 | 30       | 29.5  | 18.1  | 19.4  | 31.7  | 0.5   |
| New Zealand | Large-active | 717 | 30       | 29.6  | 18.2  | 19.4  | 31.8  | 0.5   |
| Taiwan      | Small-time   | 310 | 30       | 29.5  | 18.1  | 19.4  | 31.7  | 0.1   |
| Taiwan      | Small-active | 310 | 30       | 29.6  | 18.2  | 19.4  | 31.8  | 0.1   |
| Taiwan      | Large-time   | 610 | 30       | 29.5  | 18.1  | 19.4  | 31.7  | 0.1   |
| Taiwan      | Large-active | 610 | 30       | 29.3  | 18    | 19.2  | 31.5  | 0.1   |

**Table S3:** Summary of the COVID-19 pandemic in the four target islands. Total passenger arrivals into the island in the Jan-Mar period are counted. All dates are in the year 2020. The number of confirmed cases and the percentage of cases with recent overseas travel are reported for the Jan-Apr period. \*Visitor arrivals only.

| Island      | Population (millions) | Arrivals (millions) | First case | Border close | Confirmed cases | Overseas travel |
|-------------|-----------------------|---------------------|------------|--------------|-----------------|-----------------|
| New Zealand | 5                     | 1.6 [1]             | Feb 28     | Mar 19 [2]   | 1,129 [3]       | 39% [4]         |
| Australia   | 25                    | 4.3 [5]             | Jan 25     | Mar 20 [6]   | 6,746 [3]       | 64% [7]         |
| Iceland     | 0.34                  | 0.33* [8]           | Feb 28     | Mar 20 [9]   | 1,797 [3]       | 19% [10]        |
| Taiwan      | 23                    | 3.6 [11]            | Jan 21     | Mar 19 [12]  | 429 [13]        | 90% [13]        |

Table references

[1][http://archive.stats.govt.nz/browse\\_for\\_stats/population/Migration/provisional-international-travel-statistics.aspx](http://archive.stats.govt.nz/browse_for_stats/population/Migration/provisional-international-travel-statistics.aspx)

[2]<https://www.rnz.co.nz/news/national/412162/nz-to-close-its-borders-to-anyone-not-a-citizen-or-permanent-resident-pm-confirms>

[3][https://www.who.int/docs/default-source/coronaviruse/situation-reports/20200430-sitrep-101-covid-19.pdf?sfvrsn=2ba4e093\\_2](https://www.who.int/docs/default-source/coronaviruse/situation-reports/20200430-sitrep-101-covid-19.pdf?sfvrsn=2ba4e093_2)

[4]<https://www.health.govt.nz/our-work/diseases-and-conditions/covid-19-novel-coronavirus/covid-19-current-situation/covid-19-current-cases>

[5]<https://www.abs.gov.au/ausstats/abs@.nsf/mf/3401.0>

[6]<https://7news.com.au/lifestyle/health-wellbeing/australia-closes-borders-to-stop-coronavirus-c-752927>

[7]<https://www.health.gov.au/sites/default/files/documents/2020/04/coronavirus-covid-19-at-a-glance-30-april-2020.pdf>

[8]<https://www.ferdamalastofa.is/static/files/ferdamalastofa/Frettamyndir/2020/mai/april-2020-e.pdf>

[9]<https://www.schengenvisainfo.com/news/iceland-starts-implementing-schengen-and-eu-travel-ban/>

[10]<https://www.covid.is/data>

[11]<https://www.taiwannews.com.tw/en/news/3931135>

[12]<https://thediplomat.com/2020/03/taiwan-closes-borders-in-preparation-for-possible-second-wave-of-the-coronavirus/>

[13]<https://www.cdc.gov.tw/En/Bulletin/Detail/shdoy0UaEjWmbkToD9DZEQ?typeid=158>

### 3 Demes and epochs

We consider four geographical models – each comprised of a target island deme  $IS$  (Australia, Iceland, New Zealand, or Taiwan), and a mutually exclusive “rest-of-the-world” deme  $RW$ . The  $RW$  grouping of viral lineages is not biologically meaningful – it is a computational and modelling convenience – as its samples are further structured among themselves and not necessarily more similar to each other than to sequences from island demes. For this reason, the parameters associated with the  $RW$  deme are not interpreted and are treated as nuisance parameters.

Our MTBD analyses employ a general model implementation that allows for piecewise rate changes over the course of the infection (Kühnert et al., 2016), i.e., rates are held constant within time intervals, but are allowed to vary between them. An infection process is characterised by the time of the origin at  $t_0$ , and the end of its last ( $f$ -th) interval,  $t_f$  (which is also the last sampling time). Each of the  $f$  intervals is then defined by a boundary time  $t_i \in t = (t_1, \dots, t_{f-1})$ , where  $t_0 < t_1 < \dots < t_{f-1} < t_f$ . Given a parameter  $p \in \{R_e, b, s, m\}$ ,  $p_i$  is the rate inside the  $i$ -th interval  $[t_{i-1}, t_i)$ . Time intervals  $t$  are both parameter-specific and deme-specific, and are treated as data (i.e., they are not sampled; Table S4).



**Table S4:** Time intervals (epochs) used by the MTBD model, specified as  $[t_i, t_{i+1})$ .  $t_0$  and  $t_f$  correspond to the origin and the date the last sample was collected. All other times are deme-specific, and in the case of  $s$ , sample specific. The “First reported case” dates are in Table S3. For simplicity, the “Border close” date is held at March 20 for all demes, despite a one day difference existing in practice. “Mobility decline” dates are shown in Table S6. The sampling proportion  $s$  is held constant at 0 from the start of the infection until the first tip within the deme (an alignment-specific date), and then estimated in the second epoch. As there is no migration signal before the first reported case within each island, the migration rate  $m_{IS, \mathcal{RW}}$  is fixed to a negligible quantity ( $10^{-6}$ ) due to its non-identifiability. Nuisance parameters ( $\mathcal{RW}$  deme) are modelled with a single time interval over which they are sampled.

| Parameter(s)                     | Deme           | $i$ | Time interval       |                     |
|----------------------------------|----------------|-----|---------------------|---------------------|
|                                  |                |     | Start ( $t_i$ )     | End ( $t_{i+1}$ )   |
| $R_e$ and $b$                    | $\mathcal{IS}$ | 0   | $t_0$               | First reported case |
| $R_e$ and $b$                    | $\mathcal{IS}$ | 1   | First reported case | Mobility decline    |
| $R_e$ and $b$                    | $\mathcal{IS}$ | 2   | Mobility decline    | $t_f$               |
| $R_e$ and $b$                    | $\mathcal{RW}$ | 0   | $t_0$               | $t_f$               |
| $s = 0$                          | $\mathcal{IS}$ | 0   | $t_0$               | First sample        |
| $s$                              | $\mathcal{IS}$ | 1   | First sample        | $t_f$               |
| $s = 0$                          | $\mathcal{RW}$ | 0   | $t_0$               | First sample        |
| $s$                              | $\mathcal{RW}$ | 1   | First sample        | $t_f$               |
| $m_{IS, \mathcal{RW}} = 10^{-6}$ | —              | 0   | $t_0$               | First reported case |
| $m_{\mathcal{RW}, \mathcal{IS}}$ | —              | 0   | $t_0$               | First reported case |
| $m_{IS, \mathcal{RW}}$           | —              | 1   | First reported case | Border close        |
| $m_{\mathcal{RW}, \mathcal{IS}}$ | —              | 1   | First reported case | Border close        |
| $m_{IS, \mathcal{RW}}$           | —              | 2   | Border close        | $t_f$               |
| $m_{\mathcal{RW}, \mathcal{IS}}$ | —              | 2   | Border close        | $t_f$               |

### 3.1 A model of human movement decrease for mobile phone data

Defining time intervals characterised by different levels of human movement is challenging, as the four “island” considered here differ markedly in their response to COVID-19. No single date (such as the day of lockdown, for example) could be used across countries: while the governments of New Zealand and Australia locked human movement down to different extents for several weeks, those of Iceland and Taiwan, on the other hand, found it sufficient to restrict the size of gatherings and encourage social distancing (Hale et al., 2020).

In order to define country-specific time intervals in a statistically principled way, we first parameterise human movement decrease with a sigmoid model describing how mobility (Apple, 2020; Fig. S1) changes as a function of time  $t$ :

$$s(t|t_0, d, a, r) = 1.0 - a(S(mt + c) - S(m_r t + c_r)), \quad (1)$$

the parameters of which are described in table S5. Here,  $S$  corresponds to the sigmoid (logistic) function  $S(x) = \frac{1}{1+e^{-x}}$ , and  $m$ ,  $c$ ,  $m_r$  and  $c_r$  are deterministically defined in terms of other parameters such that:

1.  $1 - S(m(t_0 + d) + c) = S(mt_0 + c) = \frac{1-\alpha}{2}$ , i.e.,  $\alpha$  of the decrease occurs between  $t_0$  and  $t_0 + d$ ,

2.  $S(m_r(t_0 + d) + c_r) = \frac{1-\alpha}{2}$ , i.e., only  $\frac{1-\alpha}{2}$  of the recovery has occurred at the end of the decrease, and
3.  $S(m_r(t_0 + d + d_r) + c_r) = r$ , i.e.,  $r$  of the recovery has occurred  $d_r$  after the end of the decrease.

We apply Equation 1 to our set of four demes  $\mathcal{I} = \{1, 2, 3, 4\}$  by allowing each country  $i \in \mathcal{I}$  to have its own parameters controlling the timing of the decrease,  $t_{0i}$  and  $d_i$ . Additionally, we can consider the three modes of transportation  $j$  individually (i.e.,  $j \in \mathcal{J} = \{1, 2, 3\}$ ), and allow each (country  $i$ -mode of transportation  $j$ ) pair to be characterised by its own decrease amplitude,  $a_{ij}$ , recovery amplitude  $r_{ij}$ , and mobility standard deviation parameter  $v_{ij}$  (Table S5). Finally, we let each combination of country, mode of transportation, and weekday  $k$  have its own baseline mobility mean of  $b_{ijk}$ . Note that these considerations make all parameters in equation 1 multidimensional (Table S5).

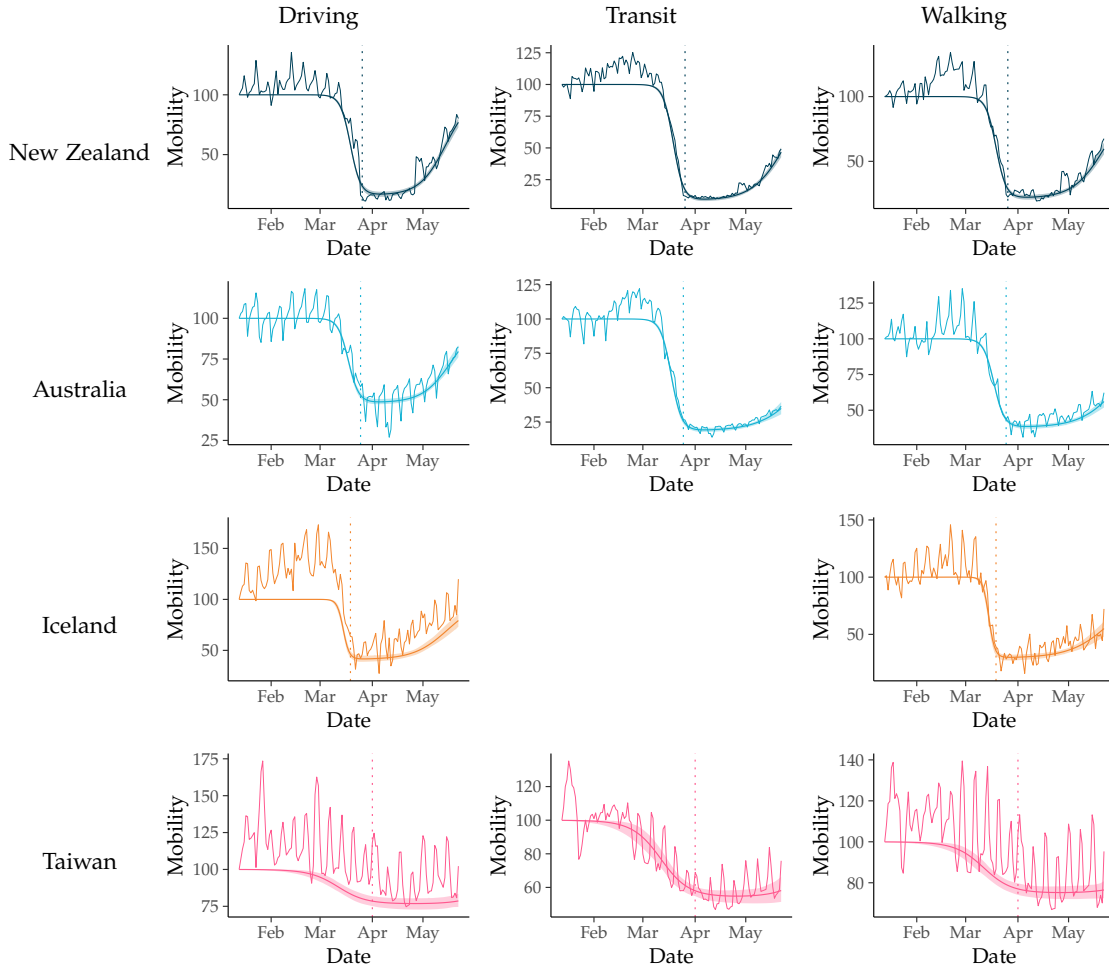

**Fig. S1:** Cell phone mobility data from New Zealand, Australia, Iceland and Taiwan, for three kinds of transportation: driving, transit and walking. The “wiggly” lines correspond to the raw data. Fit sigmoid models are shown in all graphs as a smooth shaded curve (the 2.5–97.5% quantile interval) and a solid line inside of it (the sigmoid function).

We model the human movement underlying mobility data  $\mathbf{M} = (m_{ijk})$  ( $i$ -th country,  $j$ -th mode of transportation,  $k$ -th weekday) by assuming  $M_{ijk}$  is sampled from a Normal distribution, letting:

$$f(M_{ijk}|b_{ijk}, v_{ij}, t_{0i}, d_i, a_{ij}, r_{ij}) = \mathcal{N}(M_{ijk}|b_{ijk} \times s(t; t_{0i}, d_i, a_{ij}, r_{ij}), v_{ij}), \quad (2)$$

where  $\mathcal{N}(\cdot|\mu, \sigma)$  is the probability density function of a normal distribution with mean  $\mu$  and standard deviation  $\sigma$ . Note that the baseline mean of this distribution,  $b_{ijk}$ , is scaled by the sigmoid function  $s(\cdot)$  describing the mobility decrease effect in equation 1.

Our full model is hierarchical and allows the mobility signal of the different nations to jointly and mutually inform all model parameters. This is done by using hierarchical priors, and estimating shared hyperparameters  $\theta = \{\mu_{t0}, \sigma_{t0}, \mu_d, \sigma_d, \alpha_{aj}, \beta_{aj}, \alpha_{rj}, \beta_{rj}, b_{ijk}, v_{ij}\}$ . The unnormalised posterior density of our full model is given by:

$$f(\mathbf{b}, \mathbf{v}, \mathbf{t}_0, \mathbf{d}, \mathbf{a}, \mathbf{r}, \theta|M) \propto f(\theta) \prod_{i \in \mathcal{I}} f(t_{0i}, d_i|\theta) \prod_{j \in \mathcal{J}_i} f(a_{ij}, r_{ij}, v_{ij}|\theta) \quad (3)$$

$$\prod_{k=1}^7 \left( f(b_{ijk}|\theta) \right) \prod_{t \in M_{ij}} f(M_{ij\omega(t)}|b_{ij\omega(t)}, v_{ij}, t_{0i}, d_i, a_{ij}, r_{ij}), \quad (4)$$

where  $\omega(t)$  is a deterministic function that returns the weekday of a time point  $t$ ,  $f(\theta)$  is the hyperprior density on hyperparameters  $\theta$ , and  $f(t_{0i}, d_i|\theta)$ ,  $f(a_{ij}, r_{ij}, v_{ij}|\theta)$  and  $f(b_{ijk}|\theta)$  are the prior densities on country-, transportation mode-, and weekday-level parameters, respectively (Table S5). We chose our priors following recommendation in Gelman et al. (2006). Priors are listed table S5.

We determined the boundary between time intervals characterised by “high” and “low” human movement using New Zealand as a reference. As a post processing step after MCMC, we computed and logged the proportion of mobility that had gone down in New Zealand by 26 March 2020 (according to the fitted sigmoid model), and then deterministically recorded the dates by which the other islands had undergone the same proportional reduction. Let  $S(t|t_0, d) = S(mt + c)$ , the sigmoid function describing the decrease in mobility, where  $m$  and  $c$  are defined as in Equation 1. Let  $S^{-1}(p|t_0, d)$  be the inverse of this function. Then, for a given set of parameter values, the boundary date for country  $i$  is:

$$S^{-1}(S(26 \text{ March}|t_{0z}, d_z)|t_{0i}, d_i),$$

where the subscript  $z$  refers to the index of New Zealand in the set  $\mathcal{I}$ . We used the posterior mean of this date as the boundary between time intervals.

Our model is implemented in PyMC3 (Salvatier et al., 2016), and we employed the No-U-Turn Sampler (Hoffman and Gelman, 2014) to sample the posterior distribution. We ran three independent chains

and sampled each 10000 times (after 1000 tuning samples). The three chains were visually checked for convergence and combined, yielding effective samples sizes larger than 200.

**Table S5:** Parameters of sigmoid model for human movement. These parameters share names with random variables from other models, but represent distinct quantities only used in the sigmoid model.  $N_o$  indicates a bounded Normal distribution conditioned on non-negativity, and HC indicates a Half-Cauchy distribution with location 0 and conditioned on non-negativity.

| Parameter                        | Description                                                                                                                                                                         | Prior                                  |
|----------------------------------|-------------------------------------------------------------------------------------------------------------------------------------------------------------------------------------|----------------------------------------|
| <b>Mobility model parameters</b> |                                                                                                                                                                                     |                                        |
| $\mathbf{t}_0$                   | $\mathbf{t}_0 = (t_{0i}), i \in \mathcal{I}$ , the start of the mobility decrease effect in country $i$                                                                             | $N(\mu_{t_0}, \sigma_{t_0})$           |
| $\mathbf{d}$                     | $\mathbf{d} = (d_i), i \in \mathcal{I}$ , the duration of the mobility decrease effect in country $i$                                                                               |                                        |
| $\mathbf{a}$                     | $\mathbf{a} = (a_{ij}), i \in \mathcal{I}, j \in \mathcal{J}$ , the proportional amplitude of the mobility decrease for country $i$ and transportation mode $j$                     | $\text{Beta}(\alpha_{aj}, \beta_{aj})$ |
| $\mathbf{r}$                     | $\mathbf{r} = (r_{ij}), i \in \mathcal{I}, j \in \mathcal{J}$ , the proportion of mobility decrease that recovers by $(t_0 + d + d_r)$ in country $i$ , for transportation mode $j$ | $\text{Beta}(\alpha_{rj}, \beta_{rj})$ |
| $\mathbf{b}$                     | $\mathbf{b} = (b_{ijk}), i \in \mathcal{I}, j \in \mathcal{J}, k \in \mathcal{K}$ , the baseline mobility for country $i$ , transportation mode $j$ and weekday $k$                 | $N_o(\mu_{bjk}, \sigma_{bjk})$         |
| $\mathbf{v}$                     | $\mathbf{v} = (v_{ij}), i \in \mathcal{I}, j \in \mathcal{J}$ , the mobility standard deviation for country $i$ and transportation mode $j$                                         | $\text{HC}(0.1)$                       |
| $\alpha$                         | Proportion of decrease effect which occurs between $t_0$ and $t_0 + d$                                                                                                              | Fixed to 0.99                          |
| $d_r$                            | Duration over which recovery is measured                                                                                                                                            | Fixed to 60                            |
| <b>Hyperparameters</b>           |                                                                                                                                                                                     |                                        |
| $\mu_{t_0}$                      | $\mathbf{t}_0$ prior mean                                                                                                                                                           | $N(\text{Mar 25}, 14 \text{ days})$    |
| $\sigma_{t_0}$                   | $\mathbf{t}_0$ prior standard deviation                                                                                                                                             | $\text{HC}(2.0)$                       |
| $\mu_d$                          | $\mathbf{d}$ prior mean                                                                                                                                                             | $N_o(14 \text{ days}, 7 \text{ days})$ |
| $\sigma_d$                       | $\mathbf{d}$ prior standard deviation                                                                                                                                               | $\text{HC}(2.0)$                       |
| $\alpha_a$                       | $\alpha_a = (\alpha_{aj}), j \in \mathcal{J}$ , $\mathbf{a}$ prior shape                                                                                                            | $N_o(2.0, 2.0)$                        |
| $\beta_a$                        | $\beta_a = (\beta_{aj}), j \in \mathcal{J}$ , $\mathbf{a}$ prior rate                                                                                                               | $N_o(2.0, 2.0)$                        |
| $\alpha_r$                       | $\alpha_r = (\alpha_{rj}), j \in \mathcal{J}$ , $\mathbf{r}$ prior shape                                                                                                            | $N_o(1.5, 2.0)$                        |
| $\beta_r$                        | $\beta_r = (\beta_{rj}), j \in \mathcal{J}$ , $\mathbf{r}$ prior rate                                                                                                               | $N_o(2.0, 2.0)$                        |
| $\mu_b$                          | $\mu_b = (\mu_{bjk}), j \in \mathcal{J}, k \in \mathcal{K}$ , $\mathbf{b}$ prior mean                                                                                               | $N_o(1.0, 0.2)$                        |
| $\sigma_b$                       | $\sigma_b = (\sigma_{bjk}), j \in \mathcal{J}, k \in \mathcal{K}$ , $\mathbf{b}$ prior standard deviation                                                                           | $\text{HC}(1.0)$                       |

**Table S6:** Date boundaries of mobility reduction, according to the model described in Section 3.1 which was fit to mobile phone data (Apple, 2020). All dates are within the year of 2020. The start dates were used as epoch boundaries for  $R_e$  and  $b$ .

| $\mathcal{IS}$ | Start  | Mean   | End    |
|----------------|--------|--------|--------|
| New Zealand    | Mar 26 | Mar 26 | Mar 26 |
| Australia      | Mar 24 | Mar 25 | Mar 26 |
| Iceland        | Mar 18 | Mar 19 | Mar 20 |
| Taiwan         | Mar 27 | Mar 31 | Apr 05 |

## 4 Model definition

### 4.1 Substitution and clock models

In all analyses, the phylogenetic likelihood was evaluated under the HKY substitution model with estimated nucleotide equilibrium frequencies  $\pi_D$ . Sites were partitioned into non-coding sites and the three codon positions, with each partition having its own substitution model parameters. The end regions were masked because they are suspected to harbour many sequencing errors (as described by <http://virological.org/t/issues-with-sars-cov-2-sequencing-data/473>). Because SARS-CoV-2 genomes have undergone a small number of mutations (Lai et al., 2020; Li et al., 2020b; Rambaut, 2020), we assumed a strict molecular clock in all analyses.

#### 4.1.1 Partition schemes and substitution model selection

We compared substitution models and partition schemes based on their posterior distributions over  $\mathcal{T}$ , and picked the simplest model generating the least different posterior distribution. For example, substitution models more complex than HKY did not affect the posterior distribution of  $\mathcal{T}$  relative to HKY, while simpler models such as JC69 (Jukes Cantor 1969) yielded a posterior distribution that was substantially different. Therefore, we selected HKY with estimated frequencies. Model comparison was done with BModelTest (Bouckaert and Drummond, 2017). By the same token, we did not opt for single partition analyses – which led to very different tree posteriors compared to the chosen partition scheme (see main text) – and rejected adding further partitions (e.g., on gene boundaries) because they did not alter the tree posterior significantly.

### 4.2 Phylodynamic models

#### 4.2.1 Discrete phylogeography (DPG)

The DPG model (Lemey et al., 2009) employs a continuous-time Markov chain in similar fashion to substitution models used in molecular evolution studies, but one in which a single “character” is considered: the discrete location (the deme) a lineage occupies in space. Lineages are allowed to change demes over time, with demes being inherited by children lineages according to a phylogenetic tree. As opposed to nucleotide substitution models that emit four discrete states, however, the DPG model can emit  $d$  states, where  $d$  is the number of demes represented in the data.

Under the DPG model, state transitions correspond to migrations events (i.e., a lineage moves from one

deme to another) that happen as described by a  $2 \times 2$  symmetric, infinitesimal rate matrix:

$$\mathbf{m} = \mu_m \mathbf{S} \mathbf{\Pi} = \mu_m \begin{bmatrix} -\pi_{IS} & \pi_{IS} \\ \pi_{RW} & -\pi_{RW} \end{bmatrix}, \quad (5)$$

where  $\mu_m$  is an overall rate scaler,  $\mathbf{S}$  is a matrix of relative rates of changing demes, and  $\mathbf{\Pi} = \text{diag}(\pi)$  (with  $\pi$  being the equilibrium deme frequencies; Table S7). Note that (i)  $\mathbf{\Pi}$  is estimated as opposed to  $\mathbf{S}$ , because the two are non-identifiable (i.e., a symmetric model), (ii)  $\mathbf{\Pi}$  is normalised such that  $\mu_m$  reflects the number of migration events per unit time (Lemey et al., 2009), and (iii) the frequencies  $\mathbf{\Pi}$  at the root are fixed at  $\mathbf{\Pi} = (\pi_{IS}, \pi_{RW}) = (0, 1)$  to incorporate knowledge of the infection originating outside of the four island demes of interest.

Finally, we couple our DPG model implementation to the Bayesian skyline model (Drummond et al., 2005) to allow for effective population size ( $N_e$ ) changes over ten time intervals. Following the notation from the main manuscript, under the DPG we have:

$$f(\mathcal{T}|\theta_\tau) = f(\mathcal{T}|\mu_m, \pi, N_e). \quad (6)$$

#### 4.2.2 Two epoch discrete phylogeography (DPG2)

The two epoch discrete phylogeography model (DPG2) generalises the DPG model by distinguishing two time intervals: one before and one after  $t = 19$  March 2020, the date in which both New Zealand and Taiwan closed its borders (Australia and Iceland closed theirs in the following day). These two time intervals are characterised by their own  $\mathbf{m}$  rate matrix. Following the notation from the main manuscript, under the DPG2 model we have:

$$f(\mathcal{T}|\theta_\tau) = f(\mathcal{T}|\mu_m, \pi, N_e, t). \quad (7)$$

Note that  $t$  here is fixed and treated as data. In computing this density, only one  $\mathbf{m}$  matrix is used for branches contained in their entirety within a time interval; branches that are intersected by  $t$ , on the other hand, have transition probabilities computed by combining two different  $\mathbf{m}$  matrices (Bielejec et al., 2014).

### 4.2.3 Structured coalescent (SC)

The fourth phylodynamic model we used was the structured coalescent model implemented in MASCOT (Marginal Approximation of the Structured Coalescent; Müller et al. (2018)). Structured coalescent models allow one to estimate demographic parameters and genealogical relationships among sub-populations (demes), but estimation under exact implementations is costly because lineage ancestral states must be sampled with MCMC. The marginal approximation of the structured coalescent (MASCOT) model, on the other hand, circumvents this issue by integrating over all possible migration histories (Müller et al., 2018). Under this model, we estimate population sizes for each deme  $i$ ,  $\mathbf{N} = (N_e^i)$ , and an among-deme migration rate matrix  $\mathbf{m}$ . Following the notation from the main text:

$$f(\mathcal{T}|\theta_\tau) = f(\mathcal{T}|S, m, \mathbf{N}), \quad (8)$$

where  $S$  is treated as data containing the deme information for each sample.

### 4.2.4 Multi-type birth-death (MTBD)

The full probabilistic graphical model given the MTBD tree prior used in this study can be seen in Fig. S2.

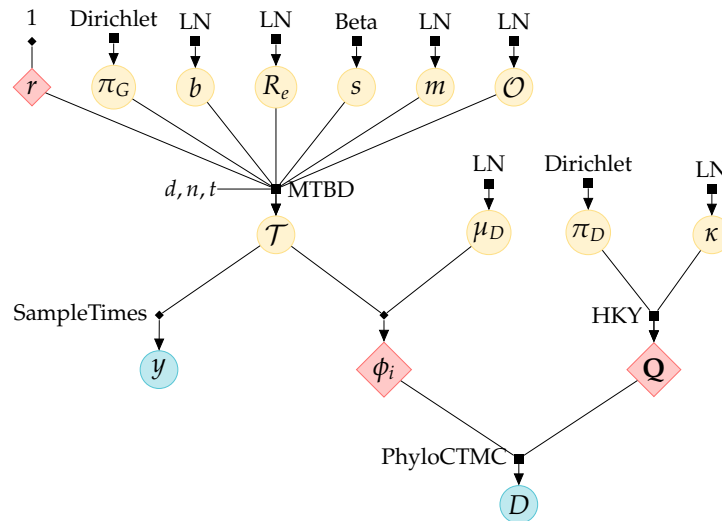

**Fig. S2:** Full MTBD probabilistic graphical model used in our study. Yellow and blue circles correspond to parameters and observed data, respectively. Red diamonds are deterministic functions and their outcomes. Filled squares represent sampling distributions (e.g., “MTBD”, multitype birth-death; “HKY”, Hasegawa-Kishino-Yano substitution model).

### 4.3 Prior distributions

The prior distributions used in this article are summarised in Table S7. Priors for  $\mathcal{O}$ ,  $s$ ,  $m$ , and  $\pi_G$  were programatically generated for each alignment and are detailed in the following subsections.

**Table S7:** Summary of prior distributions.  $\Gamma(\alpha, \beta)$  denotes a gamma distribution with shape parameter  $\alpha$  and inverse scale parameter  $\beta$ ; “LN( $\mu, \sigma$ )” denotes a log-normal distribution with log-space mean  $\mu$  and log-space standard deviation  $\sigma$ ; “Exp( $\mu$ )” denotes an exponential distribution with a mean of  $\mu$ . “Dir( $\alpha_1, \dots, \alpha_m$ )” is a Dirichlet distribution with shapes ( $\alpha_1, \dots, \alpha_m$ ). \*Origin time prior distribution has an offset (see Section 4.3.1). \*\* $s$  is parameterised as  $s'$  (see Section 4.3.2).

| Parameter                                     | Description                                      | Prior distribution    |
|-----------------------------------------------|--------------------------------------------------|-----------------------|
| <b>DPG/DPG2 parameters</b>                    |                                                  |                       |
| $\mu_m$                                       | Migration rate scaler                            | $\Gamma(0.001, 1000)$ |
| $\pi$                                         | Equilibrium deme frequencies                     | Dir(1, 1)             |
| $N_e(0)$                                      | Effective population size baseline               | LN(0, 2)              |
| $N_e(i), i > 0$                               | Effective population size change                 | Exp( $N(i - 1)$ )     |
| <b>SC parameters</b>                          |                                                  |                       |
| $N_e$                                         | Effective population size                        | LN(0.007, 1)          |
| $m$                                           | Migration rates                                  |                       |
| <b>MTBD parameters</b>                        |                                                  |                       |
| $R_e$                                         | Basic reproduction number                        | LN(1.0, 0.7)          |
| $b$                                           | Rate of becoming non-infectious                  | LN(4.09, 0.2)         |
| $\mathcal{O}$                                 | Origin time                                      | LN(-1.98, 0.4)*       |
| $r$                                           | Removal probability                              | 1                     |
| $s$                                           | Sampling proportion                              | Beta(1.1, 8.0)**      |
| $m$                                           | Migration rates                                  | LN(0, 1)              |
| $\pi_G$                                       | Equilibrium deme frequencies (see Section 4.3.3) |                       |
| <b>Substitution model parameters (shared)</b> |                                                  |                       |
| $\kappa$                                      | HKY transition-transversion ratio                | LN(1, 1.25)           |
| $\pi_D$                                       | HKY nucleotide frequencies                       | Dir(1, 1, 1, 1)       |
| $\mu_D^1$                                     | Molecular clock rate (for DPG and DPG2)          | LN(-7, 1.25)          |
| $\mu_D^2$                                     | Molecular clock rate (for MTBD and SC)           | LN(-7, 0.25)          |

#### 4.3.1 Prior for origin time

As defined in the main text, origin time  $\mathcal{O}$  represents the height of the sampled infection tree ( $\mathcal{T}$ ) in years, which goes from the most recent sample to patient zero, the first case of the disease. The time of the most recent sample can vary depending on the sampling scheme (Section 2), but with the exception of one alignment, all alignments had their most recent sample taken on 29 April 2020. Patient zero has been only tentatively placed on 17 November 2020 in Hubei, China, but at least 60 cases had been confirmed with certainty by 20 December in that country (see <https://www.scmp.com/news/china/society/article/3074991/coronavirus-chinas-first-confirmed-covid-19-case-traced-back>).



We assumed an offset log-normal prior distribution for  $\mathcal{O}$ ; specifically,  $(\mathcal{O} - \delta) \sim \text{LN}(\mu = -1.98, \sigma = 0.4)$ , where  $\delta$  is an offset defined by the time interval between the alignment-dependent first sample and 20 December 2020, a day we judged to provide positive evidence COVID-19 was spreading in China. By applying variable offsets, one can use the same log-normal parameterisation (i.e., same mean and standard deviation) for all alignments. Therefore, irrespective of the subsampling scheme, this prior translates into the first case having its mean and modal occurrence dates on 26 October and 7 November 2020, respectively. This prior also implies that the first case of COVID-19 has (1) zero probability of having happened after 20 December 2019, and (2) asymptotically zero probability of happening before mid 2019 (Fig. S3).

### 4.3.2 Priors for sampling proportion $s$

Under the MTBD model,  $s = \frac{\psi}{\psi + \mu}$  describes the proportion of sampled individuals out of all sampled and removed individuals. In the time interval prior to the first sample no sampling has happened, and hence  $s = 0$ . After the first sample,  $s$  has an upper-limit  $u$  such that  $s \leq u$ :

$$u = \frac{\text{Number of samples}}{\text{Number of confirmed cases as of date } t_f}. \quad (9)$$

The denominator on the right-hand side comes from the assumption that once an individual has become a confirmed case, they are removed from the infectious pool (i.e., we assume  $r = 1$ ). If a large proportion of infections are asymptomatic or mildly symptomatic, as is the case of COVID-19 (Day, 2020b,a; Li et al., 2020a; Lu et al., 2020),  $s$  can be an order of magnitude smaller than  $u$ .

In the equation above, note that  $u$  can be specific to a deme  $d$ , in which case we only count individuals from deme  $d$  when calculating  $u_d$ .  $u_d$  is also alignment specific; for example, in the “small-active” alignment (see Section 2) where New Zealand is the target island,  $u_{\mathcal{IS}} = 0.147$  and  $u_{\mathcal{RW}} = 8.22 \times 10^{-5}$  (3 sf). The full set of values are available in the GitHub repository accompanying this article. The number of confirmed COVID-19 cases was compiled by <https://www.worldometers.info/coronavirus/>, and we programmatically accessed these figures from the Worldometers Daily Data GitHub repository by David Bumbeishvili (<https://github.com/bumbeishvili/covid19-daily-data>).

We reparameterised  $s$  as  $s' = \frac{s}{u_d} \in [0, 1]$  so that a natural prior choice for  $s'$  would be a Beta distribution. More specifically, we assumed  $s' \sim \text{Beta}(\alpha = 1.1, \beta = 8.0)$ , which sets the mean of  $s$  at  $0.12u_d$  and bounds it at 0.0 and  $u_d$ .

**Table S8:** Alignment-specific upper limits for  $s$  in the MTBD model. Rounded to 3 sf.

| Alignment    | Island $\mathcal{IS}$ | $u_{\mathcal{IS}}$ | $u_{\mathcal{RW}}$    |
|--------------|-----------------------|--------------------|-----------------------|
| Small-active | Australia             | 0.0373             | $8.62 \times 10^{-5}$ |
|              | Iceland               | 0.139              | $8.98 \times 10^{-5}$ |
|              | New Zealand           | 0.147              | $8.22 \times 10^{-5}$ |
|              | Taiwan                | 0.255              | $8.52 \times 10^{-5}$ |
| Small-time   | Australia             | 0.0369             | $7.61 \times 10^{-5}$ |
|              | Iceland               | 0.138              | $8.83 \times 10^{-5}$ |
|              | New Zealand           | 0.147              | $8.32 \times 10^{-5}$ |
|              | Taiwan                | 0.255              | $7.44 \times 10^{-5}$ |
| Large-active | Australia             | 0.0372             | $1.98 \times 10^{-4}$ |
|              | Iceland               | 0.14               | $1.96 \times 10^{-4}$ |
|              | New Zealand           | 0.147              | $2.02 \times 10^{-4}$ |
|              | Taiwan                | 0.255              | $1.91 \times 10^{-4}$ |
| Large-time   | Australia             | 0.0369             | $1.89 \times 10^{-4}$ |
|              | Iceland               | 0.138              | $1.93 \times 10^{-4}$ |
|              | New Zealand           | 0.147              | $1.8 \times 10^{-4}$  |
|              | Taiwan                | 0.255              | $1.92 \times 10^{-4}$ |

### 4.3.3 Priors for MTBD geographical frequencies $\pi_G$

Under our MTBD model, the equilibrium frequency of each deme is assumed to be proportional to that deme's human population  $H_d$ . In the case of  $\mathcal{RW}$ ,  $H_d$  is the sum of the population of countries represented in an alignment, so this quantity is thus dependent on the subsampling scheme.  $\pi_G$  is given by:

$$\pi_G = (\pi_G(\mathcal{IS}), \pi_G(\mathcal{RW})) \sim \text{Dirichlet}\left(\frac{H_{\mathcal{IS}}}{H_{\mathcal{IS}} + H_{\mathcal{RW}}} \times k_{\pi_G}, \frac{H_{\mathcal{RW}}}{H_{\mathcal{IS}} + H_{\mathcal{RW}}} \times k_{\pi_G}\right). \quad (10)$$

Scalar  $k_{\pi_G}$  controls the variance and was set to  $k_{\pi_G} = 10^4$ . The full set of priors for  $\pi^G$  is presented in Table S9.

**Table S9:** Alignment-specific priors for  $\pi_G$  in the MTBD model. “Dir” stands for Dirichlet.

| Alignment    | Island $\mathcal{IS}$ | Prior of $\pi_G$  |
|--------------|-----------------------|-------------------|
| Small-active | Australia             | Dir(68.2, 9938.1) |
|              | Iceland               | Dir(1, 9999)      |
|              | New Zealand           | Dir(20.6, 9979.4) |
|              | Taiwan                | Dir(66.8, 9933.2) |
| Small-time   | Australia             | Dir(58.8, 9941.2) |
|              | Iceland               | Dir(0.9, 9999.1)  |
|              | New Zealand           | Dir(11.9, 9988.1) |
|              | Taiwan                | Dir(53.3, 9946.7) |
| Large-active | Australia             | Dir(63.6, 9936.4) |
|              | Iceland               | Dir(0.9, 9999.1)  |
|              | New Zealand           | Dir(13, 9987)     |
|              | Taiwan                | Dir(60.1, 9939.9) |
| Large-time   | Australia             | Dir(55, 9945)     |
|              | Iceland               | Dir(0.8, 9999.2)  |
|              | New Zealand           | Dir(10.5, 9989.5) |
|              | Taiwan                | Dir(54, 9946)     |

**Table S10:** Alignment-specific priors for  $m$  in the SC model for the “small-active” method. “LN” is a LogNormal distribution.

| Island $\mathcal{IS}$ | $m_{\mathcal{RW},\mathcal{IS}}$ | $m_{\mathcal{IS},\mathcal{RW}}$ |
|-----------------------|---------------------------------|---------------------------------|
| Australia             | LN(-15.1, 1)                    | LN(-4.7, 1)                     |
| Iceland               | LN(-19.6, 1)                    | LN(-0.8, 1)                     |
| New Zealand           | LN(-16.8, 1)                    | LN(-3.4, 1)                     |
| Taiwan                | LN(-14.9, 1)                    | LN(-4.9, 1)                     |

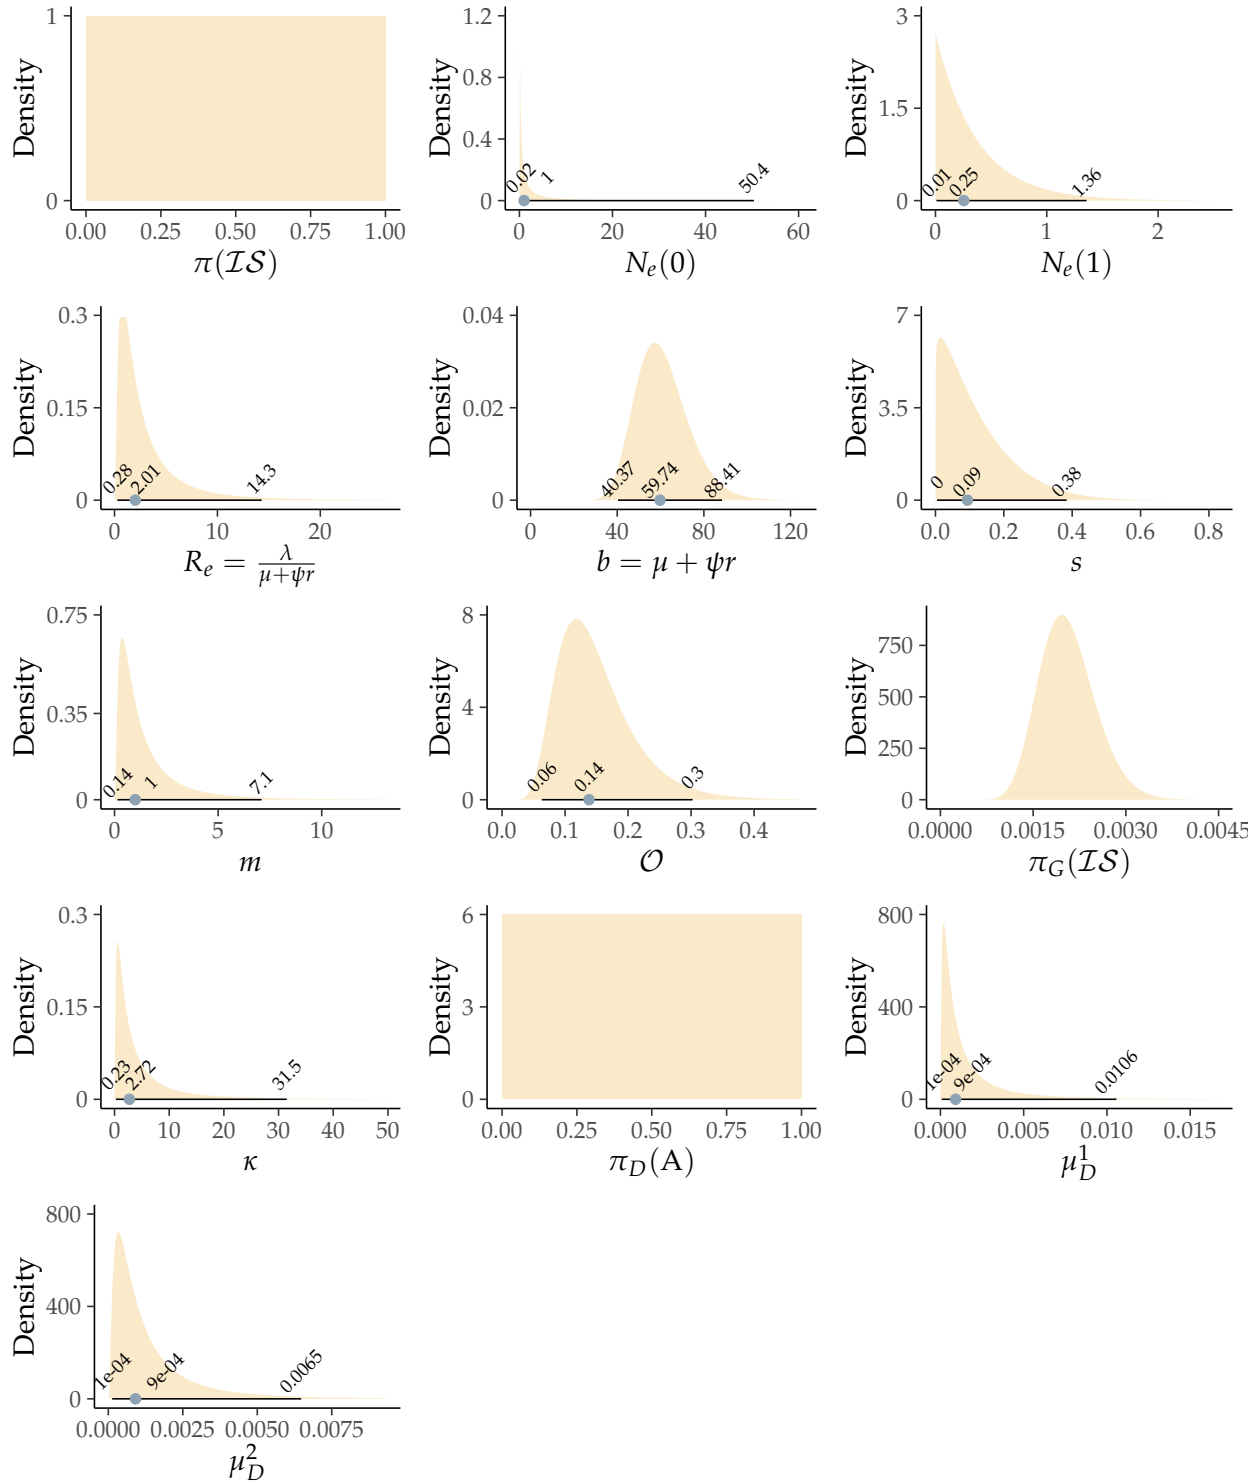

**Fig. S3:** Prior probability distributions used in our models for phylodynamic analyses. Parameters appear in the same order as in Table S7. Black horizontal lines indicate the exact intervals between 2.5% and 97.5% quantiles for the different priors; the blue dot indicates the 50% quantile (Dirichlet priors are multivariate distributions with non-unique quantiles, so those are not shown for these priors). The prior for  $N_e(1)$  assumes  $N_e(1) \sim \text{Exp}(E[N_e(0)])$ . Only one dimension of each Dirichlet priors is shown. These dimensions are:  $\pi(\mathcal{IS}) = 1 - \pi(\mathcal{RW})$  for MTBD geographical frequencies  $\pi$ ;  $\pi_G(\mathcal{IS}) = 1 - \pi_G(\mathcal{RW})$  for DPG geographical frequencies  $\pi_G$ ; and  $\pi_D(A) = 1 - \pi_D(C) - \pi_D(G) - \pi_D(T)$  for nucleotide frequencies  $\pi_D$ .

## 5 Model implementation and parameter inference

All models used in this study are implemented in BEAST 2.6 (Bouckaert et al., 2019). Parameter inference is carried out using the Metropolis-Hastings algorithm, which generates a Markov chain that explores the posterior distribution by Monte Carlo simulation (MCMC). We thus employed MCMC to sample  $(\mathcal{T}, \mu_c, \theta_\tau, \theta_s) \sim f(\mathcal{T}, \mu_c, \theta_\tau, \theta_s | D, y)$ . We used a combination of MCMC and coupled MCMC (MC3; Müller and Bouckaert (2019)), as determined by examining either method’s performance on a chain-by-chain basis.

Chain convergence was evaluated by observing a minimum ESS of 200 for the posterior, likelihood, and prior densities, as well as for all reported parameters (Tables S11, S12, S13, S14), with phylogenetic tree convergence inferred from a high correlation between posterior clade probabilities from independent chains (Fig. S4). Due to computational limitations, the “large” alignments did not fully converge for the MTBD or SC methods, and neither did the “small-active” method for MTBD. The results presented in the main text are not derived from the aforementioned chains. This highlights the appeal in the DPG model.

**Table S11:** Effective sample sizes (ESS) under the MTBD model. ESSes are in bold if they are problematic (i.e., less than 100). For vector parameters (such as  $\kappa$ ,  $R_e$ , and  $b$ ), the minimum ESS is reported.

| Alignment    | Island      | Chain length ( $10^6$ ) | posterior | likelihood | prior     | $\mu$     | Height    | $\kappa$ | $R_e$     | $b$       | $m$       | $s$   | $\pi_G$ |
|--------------|-------------|-------------------------|-----------|------------|-----------|-----------|-----------|----------|-----------|-----------|-----------|-------|---------|
| Large-active | New Zealand | 93                      | 158       | 320        | 170       | 187       | 355       | 2911     | <b>19</b> | <b>24</b> | <b>19</b> | 1135  | 4661    |
| Large-active | Australia   | 110                     | <b>31</b> | 214        | <b>34</b> | <b>37</b> | 129       | 3212     | <b>18</b> | <b>49</b> | <b>10</b> | 1175  | 4942    |
| Large-active | Iceland     | 234                     | 104       | 104        | 105       | 162       | 1909      | 3271     | 742       | 294       | 546       | 1734  | 11703   |
| Large-active | Taiwan      | 162                     | 277       | 411        | 238       | 345       | 360       | 4984     | 2075      | 2179      | 2309      | 2188  | 8091    |
| Large-time   | New Zealand | 91                      | 100       | 101        | 117       | 145       | 404       | 3101     | <b>23</b> | <b>11</b> | 471       | 971   | 3956    |
| Large-time   | Australia   | 122                     | <b>65</b> | 211        | <b>79</b> | 195       | 1365      | 3823     | 224       | <b>42</b> | 130       | 1830  | 5910    |
| Large-time   | Iceland     | 218                     | <b>41</b> | 110        | <b>44</b> | <b>74</b> | 116       | 6948     | <b>5</b>  | <b>5</b>  | <b>5</b>  | 620   | 10901   |
| Large-time   | Taiwan      | 137                     | 285       | 452        | 279       | 435       | 427       | 4779     | 1250      | <b>30</b> | 1597      | 3181  | 6322    |
| Small-active | New Zealand | 158                     | <b>70</b> | 1497       | <b>68</b> | <b>70</b> | <b>98</b> | 2599     | 1208      | 488       | 125       | 940   | 7496    |
| Small-active | Australia   | 122                     | <b>42</b> | 123        | <b>43</b> | <b>39</b> | <b>59</b> | 3036     | 227       | 243       | 262       | 333   | 5600    |
| Small-active | Iceland     | 374                     | 173       | 1716       | 162       | 179       | 452       | 7905     | 1558      | 1083      | 434       | 9399  | 18679   |
| Small-active | Taiwan      | 268                     | 376       | 3165       | 355       | 320       | 444       | 9041     | 147       | 1034      | 143       | 8007  | 13204   |
| Small-time   | New Zealand | 174                     | 291       | 1930       | 396       | 414       | 976       | 5593     | 812       | 1787      | 840       | 6360  | 8243    |
| Small-time   | Australia   | 214                     | 413       | 2683       | 397       | 573       | 1656      | 8106     | 2820      | 1049      | 1496      | 6411  | 10693   |
| Small-time   | Iceland     | 409                     | 325       | 1030       | 295       | 404       | 1291      | 12747    | 265       | 684       | 159       | 14746 | 20189   |
| Small-time   | Taiwan      | 280                     | 587       | 2128       | 533       | 730       | 2224      | 10535    | 1637      | 628       | 1957      | 7266  | 14023   |

**Table S12:** Effective sample sizes under the SC model. See Table S11 caption for notation.

| Alignment    | Island      | Chain length (10 <sup>6</sup> ) | posterior | likelihood | prior     | $\mu$ | Height | $\kappa$ | $N_e$ | $m$  |
|--------------|-------------|---------------------------------|-----------|------------|-----------|-------|--------|----------|-------|------|
| Large-active | New Zealand | 269                             | 121       | <b>26</b>  | 211       | 310   | 181    | 5289     | 269   | 1703 |
| Large-active | Australia   | 204                             | 343       | <b>91</b>  | 294       | 403   | 118    | 15768    | 379   | 1364 |
| Large-active | Iceland     | 240                             | 321       | <b>31</b>  | <b>72</b> | 171   | 292    | 17602    | 106   | 496  |
| Large-active | Taiwan      | 278                             | 570       | 163        | 422       | 420   | 157    | 22350    | 536   | 1897 |
| Large-time   | New Zealand | 269                             | 351       | <b>43</b>  | 290       | 266   | 381    | 21108    | 240   | 546  |
| Large-time   | Australia   | 317                             | 668       | 340        | 407       | 806   | 299    | 26585    | 787   | 1782 |
| Large-time   | Iceland     | 253                             | 441       | 195        | 374       | 675   | 305    | 20296    | 553   | 1936 |
| Large-time   | Taiwan      | 279                             | 649       | 122        | 437       | 574   | 342    | 18439    | 426   | 1332 |
| Small-active | New Zealand | 270                             | 331       | <b>66</b>  | 1055      | 2036  | 804    | 16208    | 1612  | 3029 |
| Small-active | Australia   | 240                             | 833       | 334        | 691       | 1054  | 445    | 16094    | 1040  | 2771 |
| Small-active | Iceland     | 240                             | 1143      | 1106       | 1006      | 1953  | 560    | 12543    | 1650  | 2298 |
| Small-active | Taiwan      | 270                             | 1240      | 175        | 378       | 556   | 720    | 20527    | 557   | 4134 |
| Small-time   | New Zealand | 270                             | 770       | 669        | 526       | 217   | 668    | 11967    | 203   | 634  |
| Small-time   | Australia   | 240                             | 768       | 418        | 408       | 986   | 334    | 16274    | 818   | 2333 |
| Small-time   | Iceland     | 240                             | 820       | 158        | 249       | 604   | 1092   | 14314    | 344   | 1236 |
| Small-time   | Taiwan      | 270                             | 1432      | 1735       | 835       | 1136  | 1687   | 15362    | 1111  | 2972 |

**Table S13:** Effective sample sizes under the DPG model. See Table S11 caption for notation.

| Alignment    | Island      | Chain length (10 <sup>6</sup> ) | posterior | likelihood | prior | $\mu$ | Height | $\kappa$ | $N_e$     | $m$   | $\pi$ |
|--------------|-------------|---------------------------------|-----------|------------|-------|-------|--------|----------|-----------|-------|-------|
| Large-active | New Zealand | 577                             | 125       | 173        | 134   | 125   | 306    | 2523     | <b>75</b> | 986   | 443   |
| Large-active | Australia   | 1168                            | 318       | 487        | 249   | 224   | 4269   | 5307     | <b>80</b> | 2274  | 853   |
| Large-active | Iceland     | 967                             | 1091      | <b>47</b>  | 380   | 538   | 2759   | 4359     | <b>10</b> | 1238  | 1094  |
| Large-active | Taiwan      | 1383                            | 394       | 1270       | 311   | 229   | 611    | 4933     | <b>86</b> | 367   | 346   |
| Large-time   | New Zealand | 545                             | 259       | 101        | 277   | 607   | 2762   | 2469     | <b>66</b> | 146   | 144   |
| Large-time   | Australia   | 1070                            | 875       | 848        | 668   | 1132  | 1921   | 5183     | 158       | 4860  | 3606  |
| Large-time   | Iceland     | 781                             | 843       | 930        | 491   | 911   | 4226   | 4058     | <b>89</b> | 1448  | 1106  |
| Large-time   | Taiwan      | 1329                            | 463       | 790        | 365   | 370   | 1658   | 6213     | 179       | 3963  | 2837  |
| Small-active | New Zealand | 2388                            | 4405      | 5705       | 3986  | 5443  | 9610   | 7447     | 2672      | 9809  | 7970  |
| Small-active | Australia   | 2307                            | 3999      | 4945       | 3647  | 2826  | 8699   | 6068     | 1872      | 8931  | 7074  |
| Small-active | Iceland     | 2085                            | 923       | 1550       | 721   | 1815  | 5760   | 8442     | 825       | 6881  | 5364  |
| Small-active | Taiwan      | 2700                            | 4425      | 10601      | 3814  | 2723  | 2995   | 11254    | 3275      | 825   | 768   |
| Small-time   | New Zealand | 2039                            | 3740      | 5947       | 3605  | 4391  | 8431   | 6182     | 1409      | 7195  | 5130  |
| Small-time   | Australia   | 2275                            | 3482      | 2367       | 2331  | 2197  | 23924  | 7472     | 2720      | 12194 | 10330 |
| Small-time   | Iceland     | 1353                            | 1816      | 513        | 481   | 597   | 17151  | 6428     | 1860      | 4062  | 3921  |
| Small-time   | Taiwan      | 2700                            | 4358      | 6564       | 3529  | 2971  | 16519  | 9984     | 2904      | 9238  | 8438  |

**Table S14:** Effective sample sizes under the DPG2 model. See Table S11 caption for notation.

| Alignment    | Island      | Chain length<br>( $10^6$ ) | posterior | likelihood | prior     | $\mu$ | Height | $\kappa$ | $N_e$     | $m$  | $\pi$ |
|--------------|-------------|----------------------------|-----------|------------|-----------|-------|--------|----------|-----------|------|-------|
| Large-active | New Zealand | 328                        | 170       | 263        | 294       | 293   | 827    | 3888     | 102       | 2583 | 2229  |
| Large-active | Australia   | 357                        | 396       | 586        | 412       | 489   | 2905   | 5104     | 189       | 1499 | 1730  |
| Large-active | Iceland     | 257                        | 100       | 180        | <b>87</b> | 162   | 1675   | 3669     | <b>57</b> | 1246 | 1001  |
| Large-active | Taiwan      | 439                        | 359       | 985        | 328       | 286   | 739    | 6557     | 161       | 749  | 538   |
| Large-time   | New Zealand | 315                        | 386       | <b>26</b>  | 222       | 351   | 2372   | 5714     | <b>78</b> | 2427 | 2408  |
| Large-time   | Australia   | 320                        | 580       | 1139       | 428       | 806   | 2647   | 5170     | 460       | 904  | 848   |
| Large-time   | Iceland     | 241                        | 645       | 791        | 561       | 967   | 3426   | 4569     | 254       | 1326 | 751   |
| Large-time   | Taiwan      | 418                        | 670       | 477        | 644       | 530   | 1038   | 6445     | 188       | 1736 | 1694  |
| Small-active | New Zealand | 180                        | 626       | 406        | 474       | 556   | 1019   | 2727     | 651       | 214  | 146   |
| Small-active | Australia   | 180                        | 662       | 1000       | 659       | 642   | 1408   | 2774     | 431       | 1593 | 1456  |
| Small-active | Iceland     | 180                        | 921       | 1738       | 800       | 566   | 2135   | 1840     | 256       | 676  | 615   |
| Small-active | Taiwan      | 900                        | 5977      | 9534       | 4677      | 4292  | 5677   | 16069    | 2076      | 5533 | 5474  |
| Small-time   | New Zealand | 180                        | 1201      | <b>81</b>  | 1037      | 551   | 1547   | 3061     | 370       | 1018 | 990   |
| Small-time   | Australia   | 180                        | 797       | 662        | 642       | 768   | 2886   | 2892     | 445       | 687  | 748   |
| Small-time   | Iceland     | 180                        | 807       | 217        | 500       | 521   | 3600   | 2835     | 967       | 2134 | 1948  |
| Small-time   | Taiwan      | 817                        | 3503      | 4816       | 2634      | 2742  | 12256  | 12609    | 3213      | 2686 | 2415  |

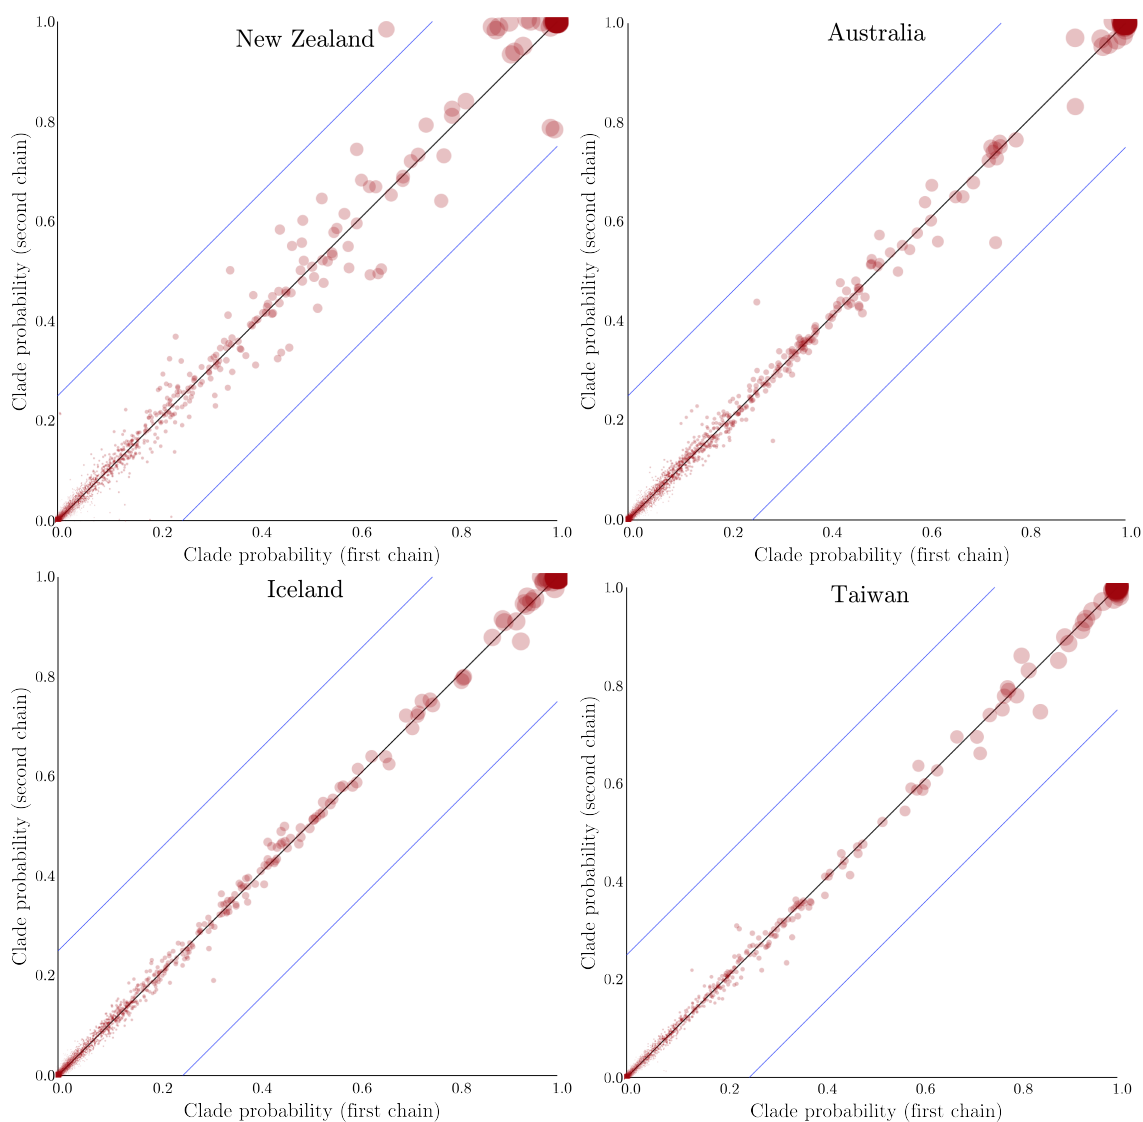

**Fig. S4:** The points on each plot are clade posterior probabilities from two independent MTBD analyses (using the “small-time” alignments). The size of each point is proportional to clade probability. These analysis indicates that tree topologies from independent MCMC chains converged to similar posterior distributions, with most probability differences being significantly less than than 0.25 (blue lines).



## 6 Supplementary results

### 6.1 Parameter estimates

Changes in posterior estimates for MTBD parameters over time intervals (for the “small-active” alignment) are presented in Fig. S5. These results indicate that the rate of becoming non-infectious  $b = \mu + \psi$  increases over time in all four islands. This results from two mechanisms: 1) an increase in sampling rate  $\psi$ , likely due to higher rates of SARS-CoV-2 genomic sequencing (Fig. S8), and 2) an increase in death rate  $\mu$ , likely due to improved measures of self-isolation and/or quarantine enforced by the respective governments (Fig. S9).

Clock rate and root height estimates vary slightly among differing models and subsampling schemes (Fig. S10). However, the four sampling methods yielded similar results for key MTBD parameters, suggesting that the MTBD analysis was not sensitive to subsampling methods (Fig. S11, S12, S13, and S14).

### 6.2 Introductions through time

The first step in quantifying SARS-CoV-2 introductions into the four  $\mathcal{IS}$  demes is to carry out ancestral state reconstruction (ASR). The main goal of ASR is to sample ancestral states at internal nodes so that states from adjacent nodes can be compared: if the state of a parent node is  $\mathcal{RW}$  and that of its child is  $\mathcal{IS}$ , an introduction is inferred. (The sampling procedure is done either simultaneously with the sampling of the tree, or during post-processing by using the parameter values logged during MCMC.) All branches of the tree can then be parsed and introductions annotated according to their chronological distribution, which allows one to plot the number of introductions over time (Fig. S15).

Under all models, ASR is carried out by traversing the tree backward in time, followed by a forward pass during which ancestral states are sampled (note that in a Bayesian framework we sample states at internal nodes, instead of trying to find the marginal or joint collection of states that maximize the likelihood, e.g., Pupko et al., 2000; Yang, 2014). In the case of DPG, DPG2, and MTBD, the tree is peeled backward so that partial likelihoods can be obtained at internal nodes and at the root, and then stochastic mapping is carried out forward in time (Nielsen, 2002; Freyman and Höhna, 2019). Under the SC model, ASR follows an approach similar in spirit to that of Pearl (1982); the procedure has been previously, and thoroughly detailed elsewhere (?).

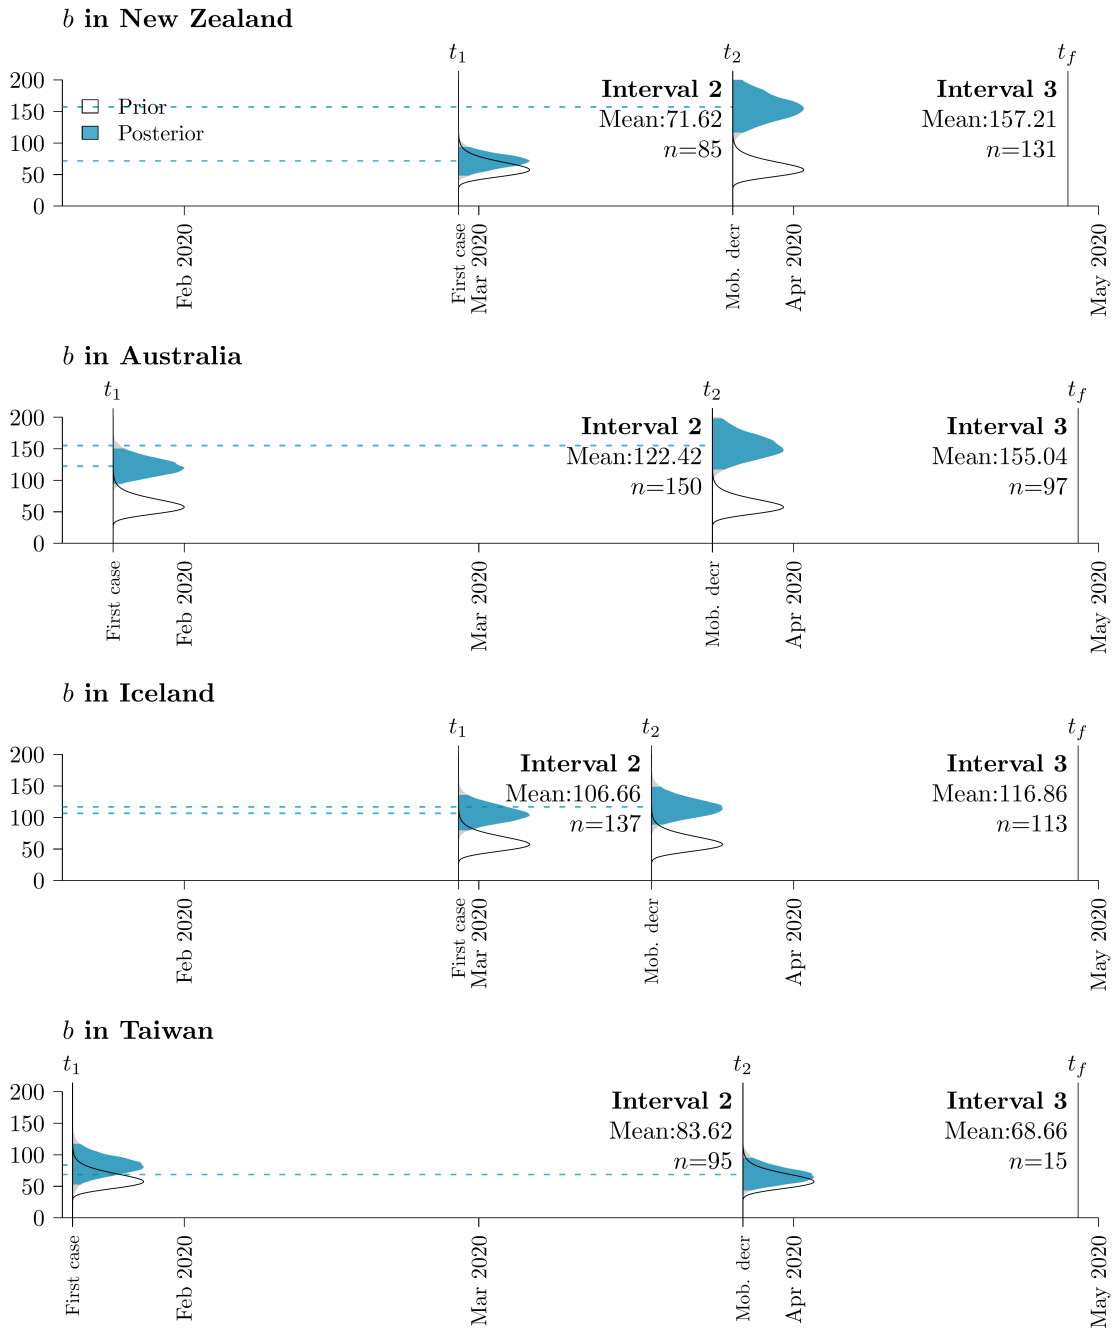

**Fig. S5:** Posterior distribution of the rate of becoming non-infectious  $b$  across the two epochs following the first reported case in the respective island. Relative prior densities and 95 % HPD intervals (blue) are displayed along the x-axis, with the mean posterior estimate indicated with a dashed line. The number of samples  $n$  from the specified country within the epoch is reported.

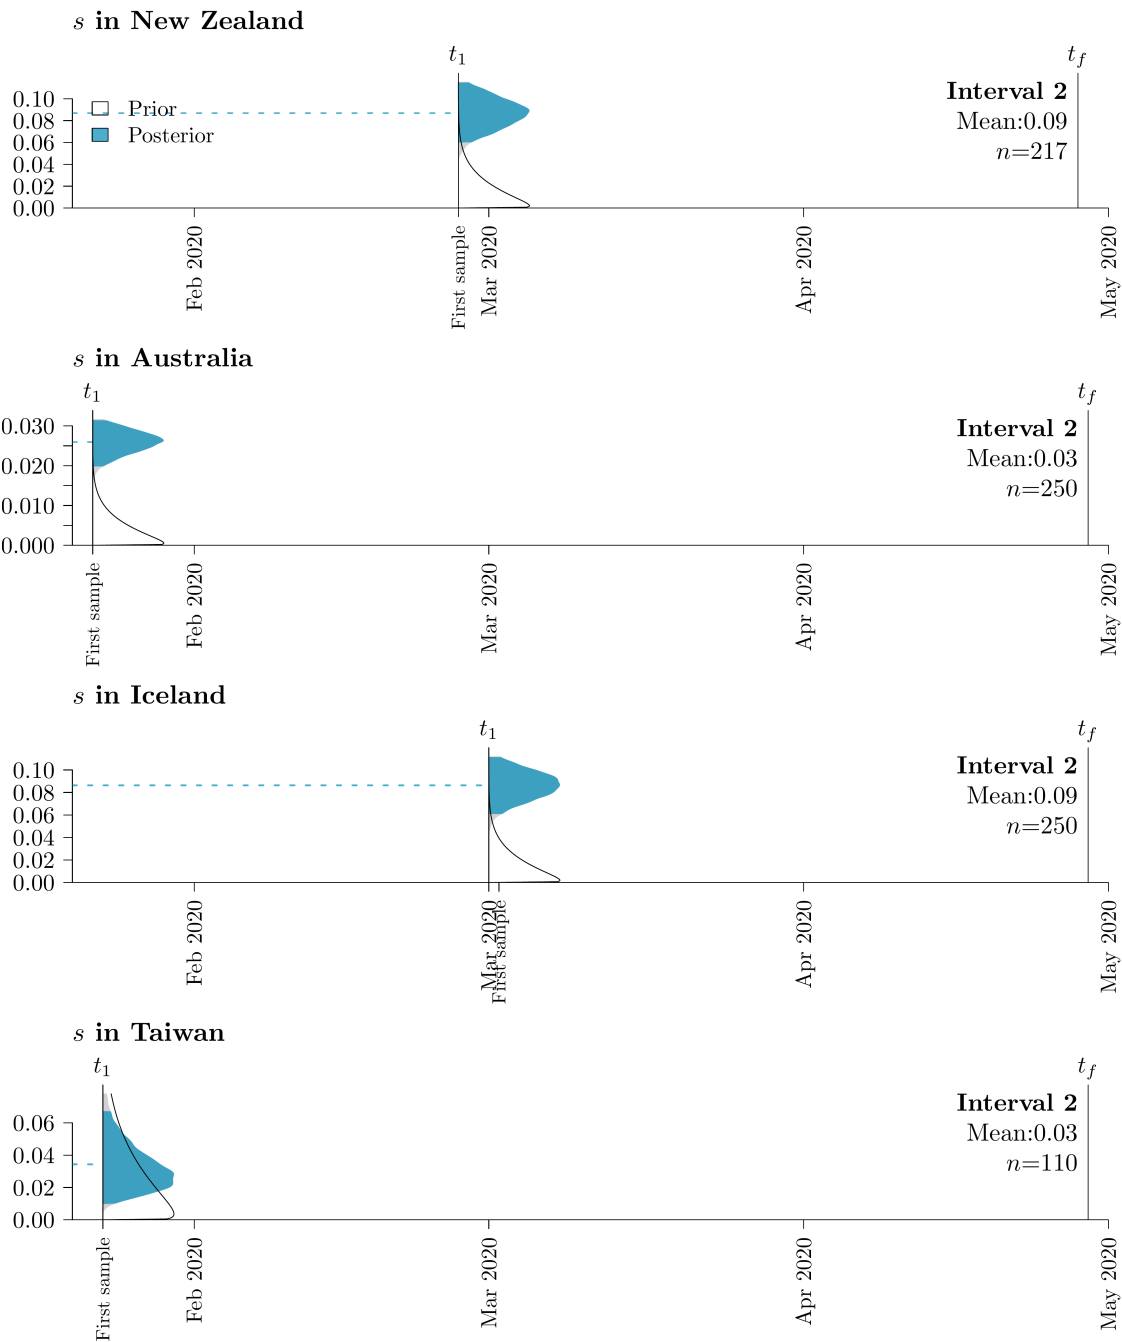

**Fig. S6:** Posterior distribution of sampling proportions  $s$  after the epoch following the first sample.  $s$  is held constant at 0 throughout the interval before the first sample. See Fig. S5 for further details on figure notation.

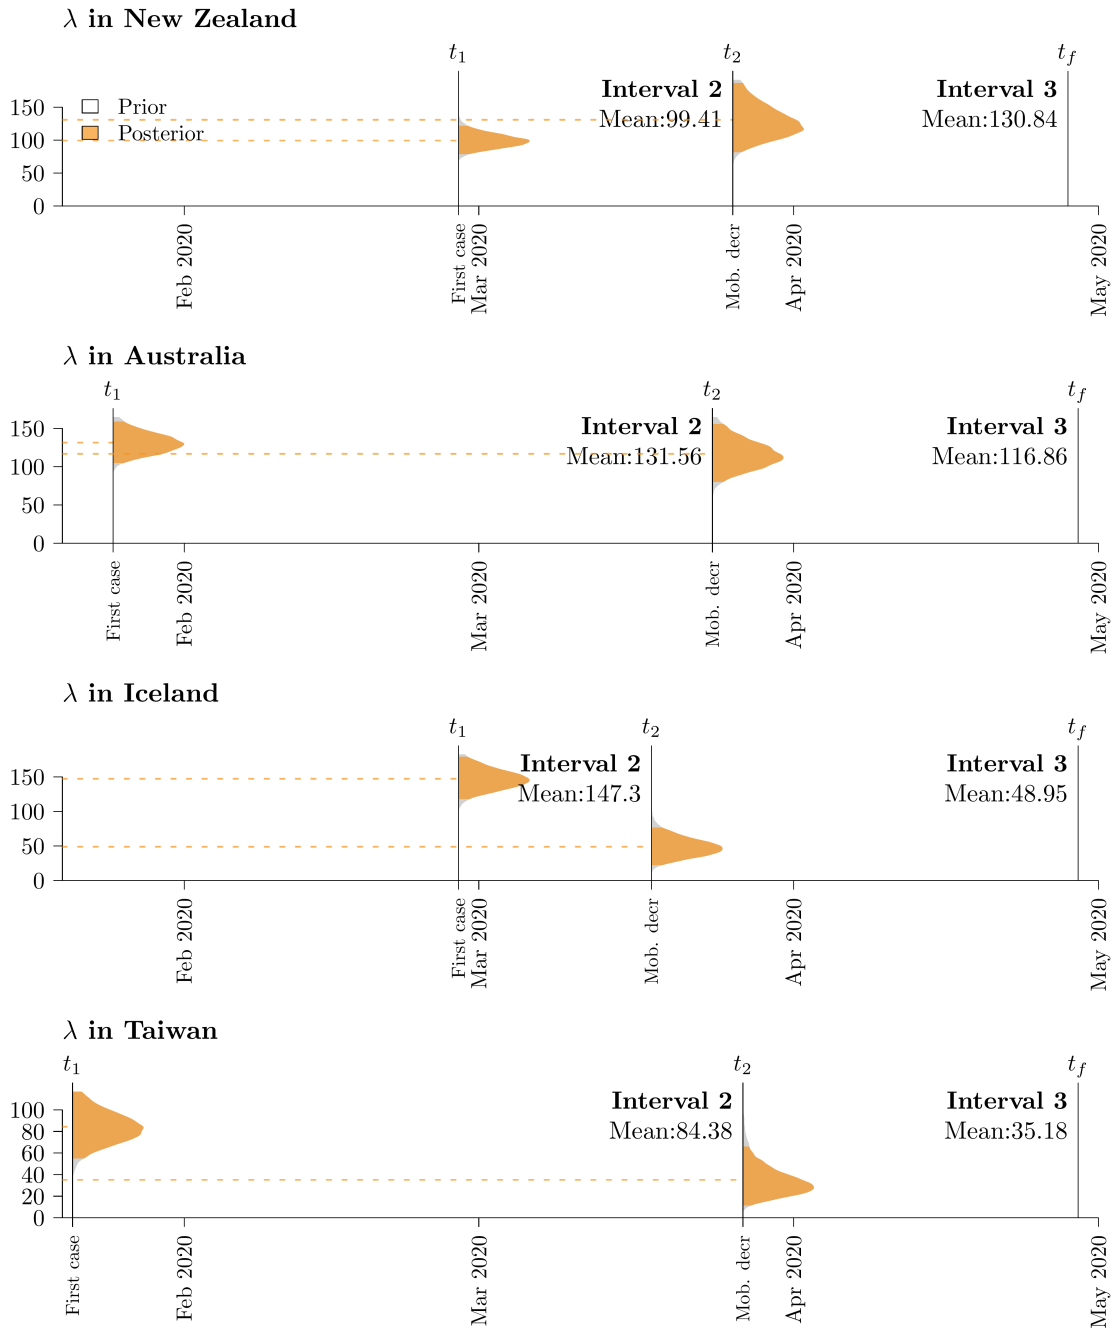

**Fig. S7:** Posterior distribution of the birth rate  $\lambda$ , following the first reported case. Although  $\lambda$  is not directly estimated as a model parameter, it can be calculated using  $\lambda = \frac{R_c}{b}$ . See Fig. S5 for further details on figure notation.

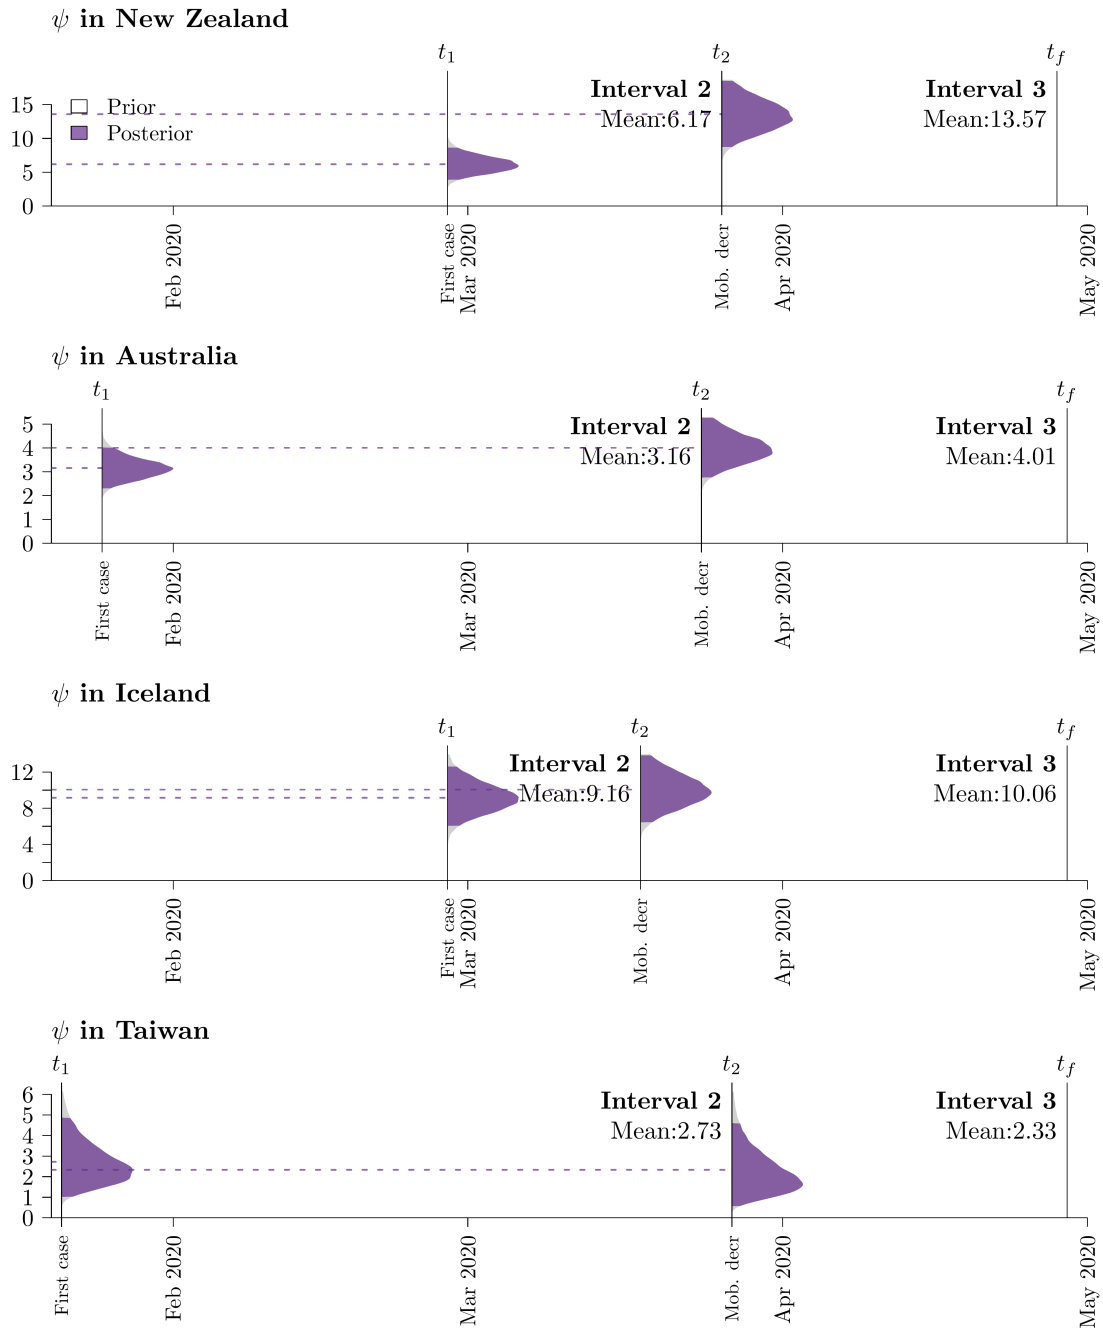

**Fig. S8:** Posterior distribution of the sampling rate  $\psi$ , following the first reported case. Although  $\psi$  is not directly estimated as a model parameter, it can be calculated using  $\psi = sb$  (when  $r = 1$ ). See Fig. S5 for further details on figure notation.

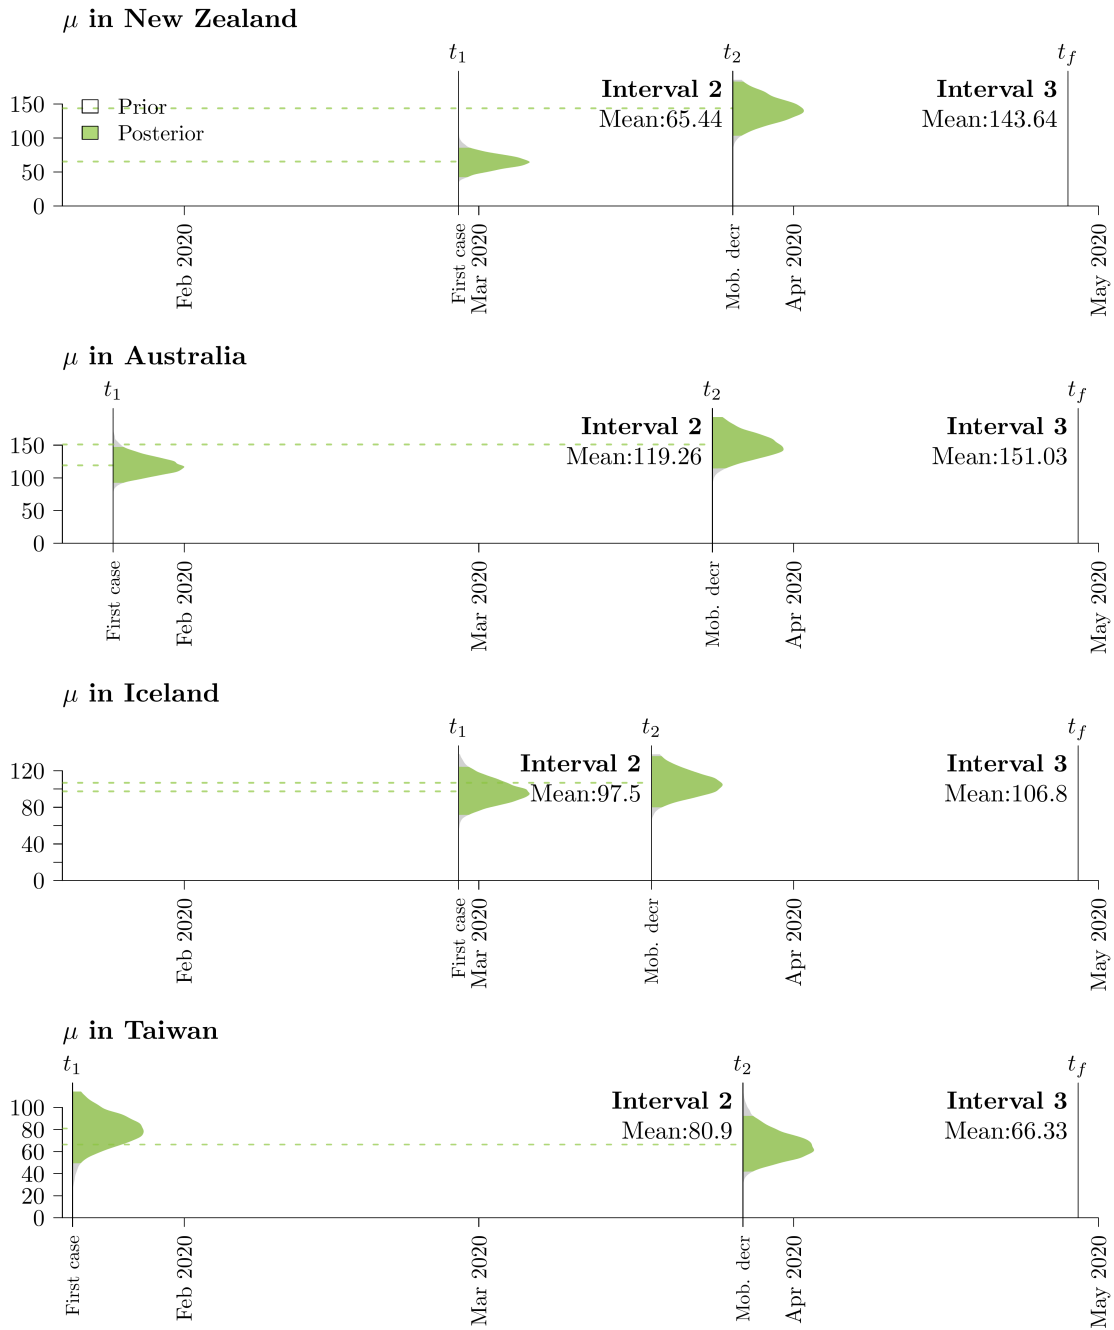

**Fig. S9:** Posterior distribution of the death rate  $\mu$ , following the first reported case. Although  $\mu$  is not directly estimated as a model parameter, it can be calculated using  $\lambda = b - sb$  (when  $r = 1$ ). See Fig. S5 for further details on figure notation.

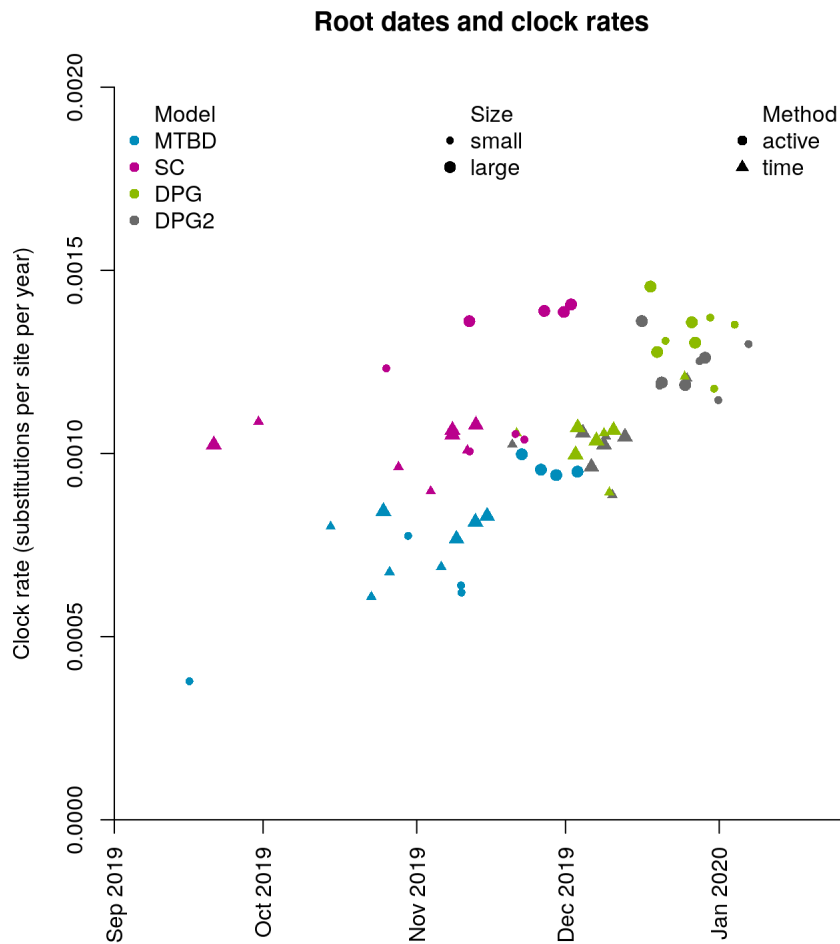

**Fig. S10:** Comparison of mean root height and clock rate estimates across the 64 combinations of sampling methods, models, and islands. These results show that MTBD and SC are less robust to changes in the sample and tend to give, on average, older tree heights. In contrast, DPG and DPG2 both give very late estimates for the root (late Dec - early Jan) when the active sampling method is employed, thus providing further evidence that the active method is not suitable for these models. For MTBD, the “small” datasets yield lower clock rates estimates.

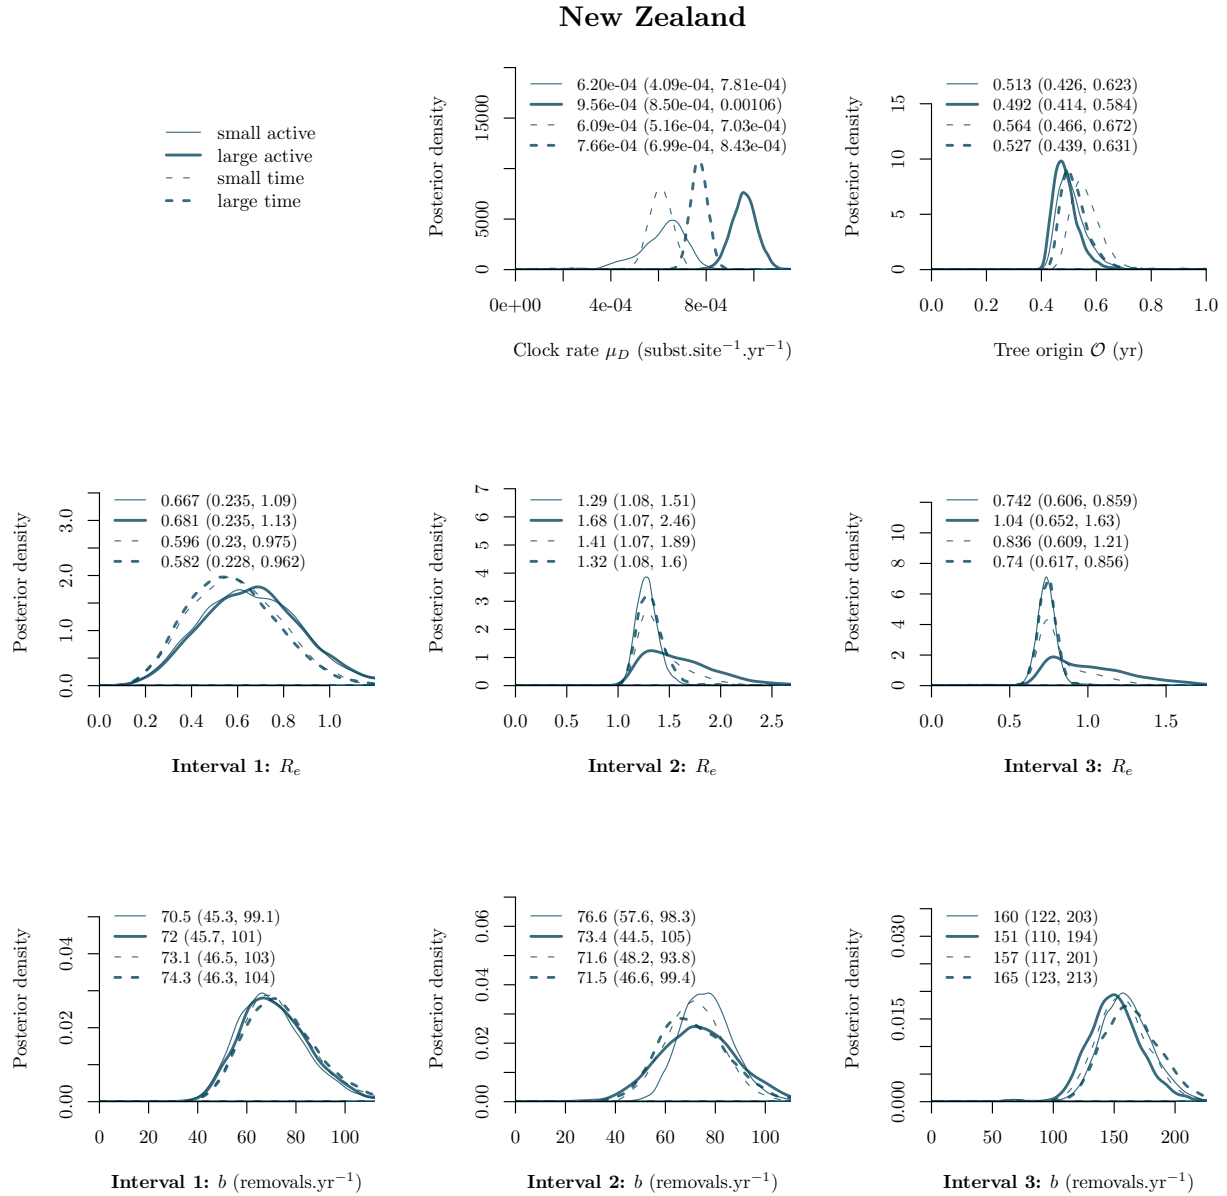

**Fig. S11:** Comparison of the four subsampling methods for New Zealand alignments. Posterior distributions of key parameters from the MTBD analyses are presented above. Alignment-specific mean estimates and 95% highest posterior density intervals are printed above the plots.



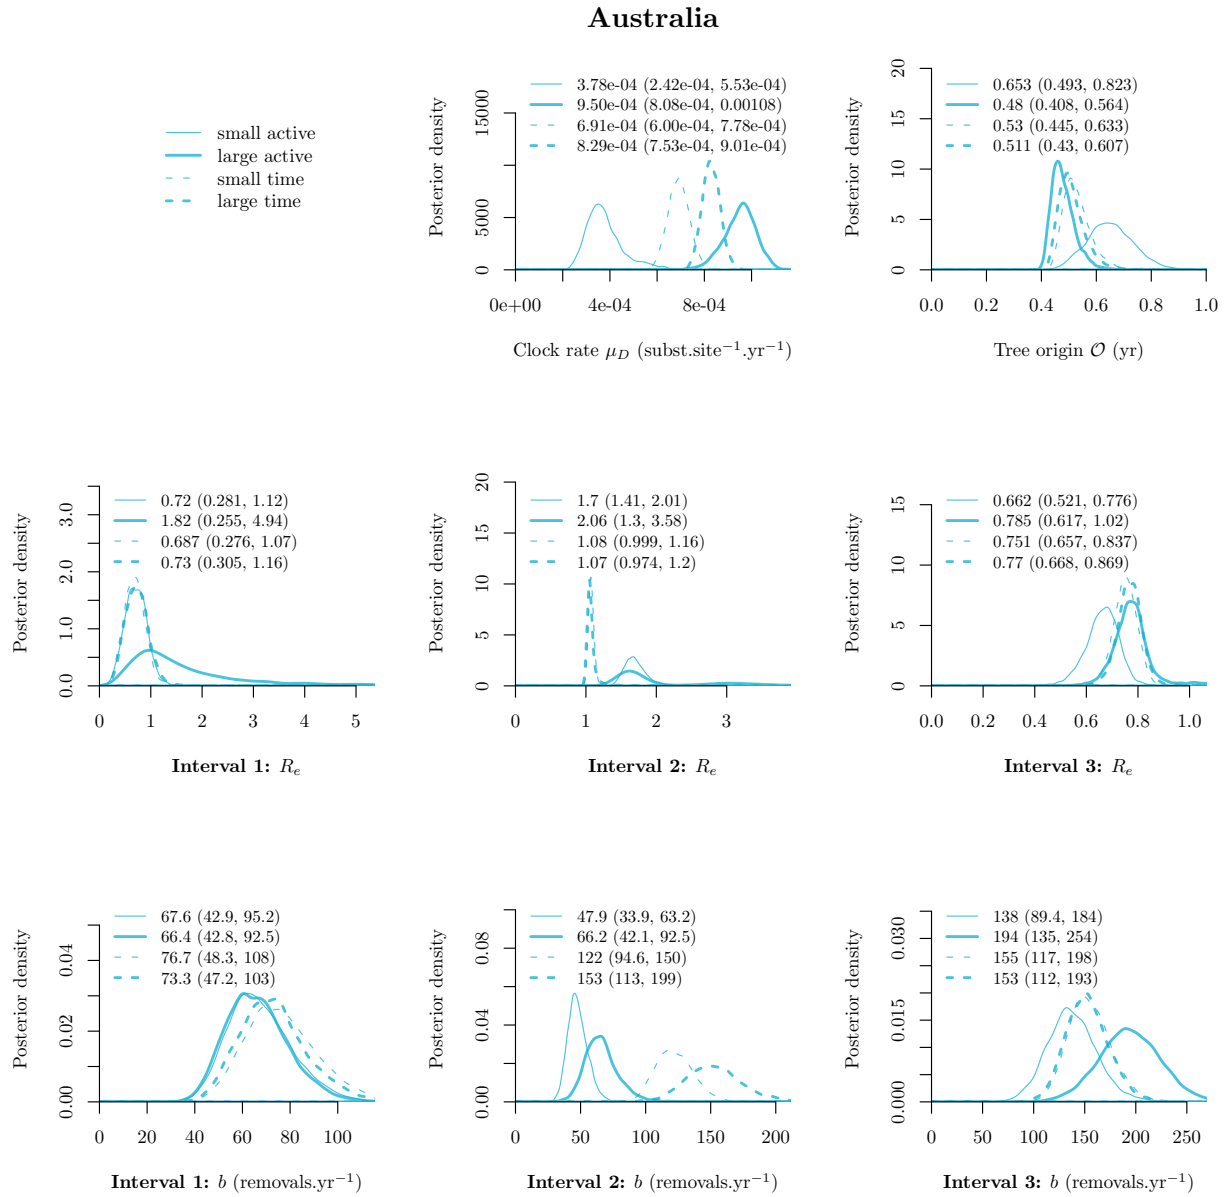

**Fig. S12:** Comparison of subsampling methods for Australia alignments. See Fig. S11 for further details.

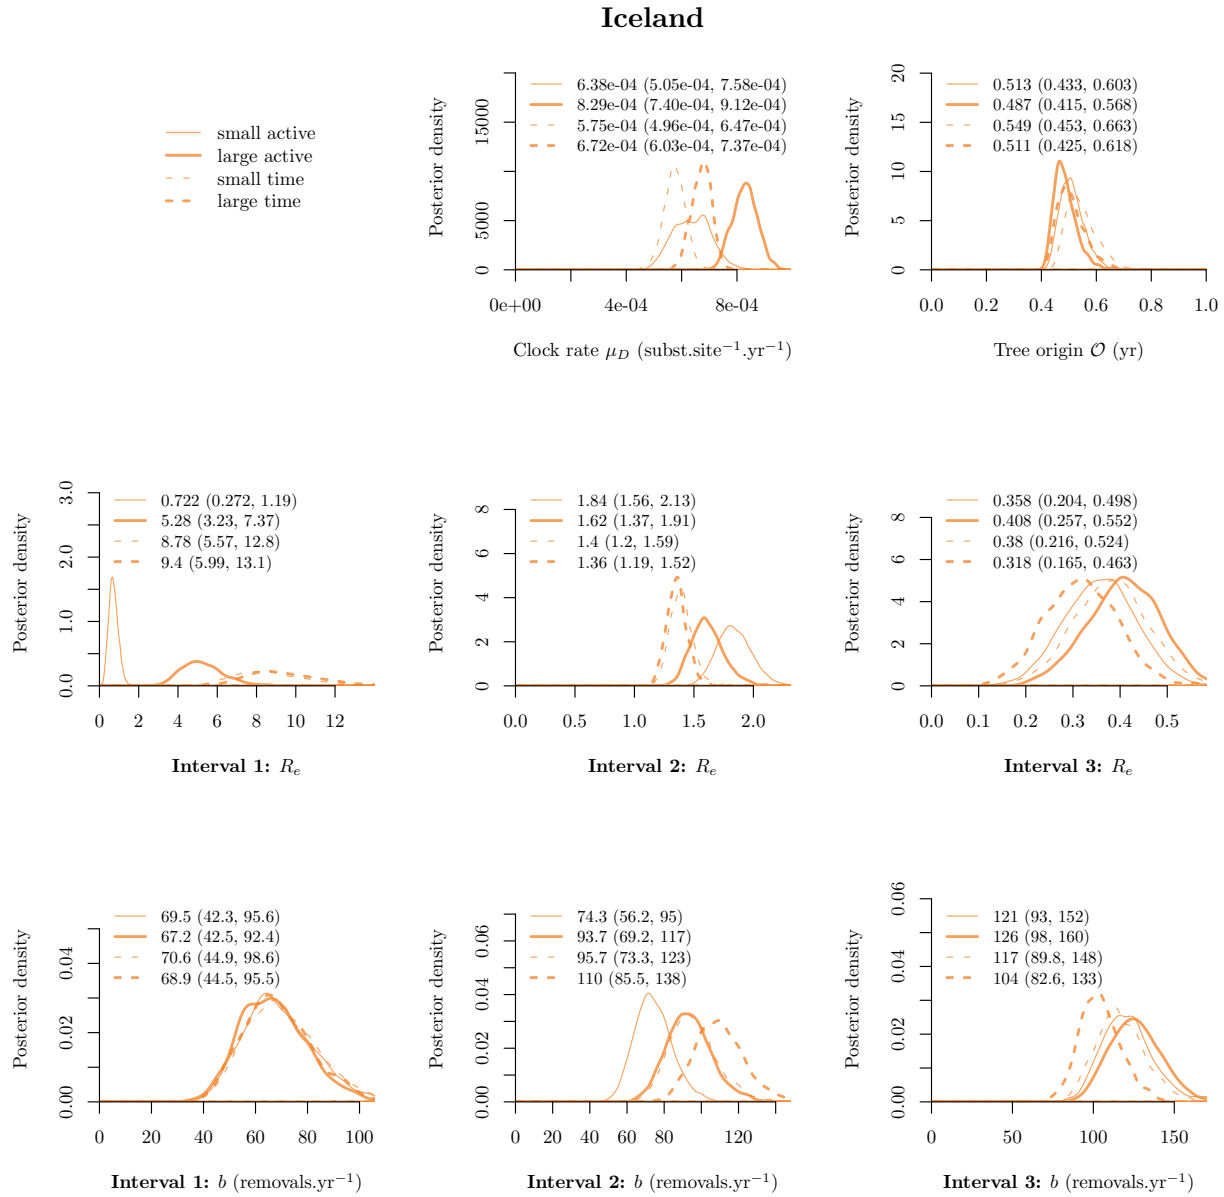

**Fig. S13:** Comparison of subsampling methods for Iceland alignments. See Fig. S11 for further details.

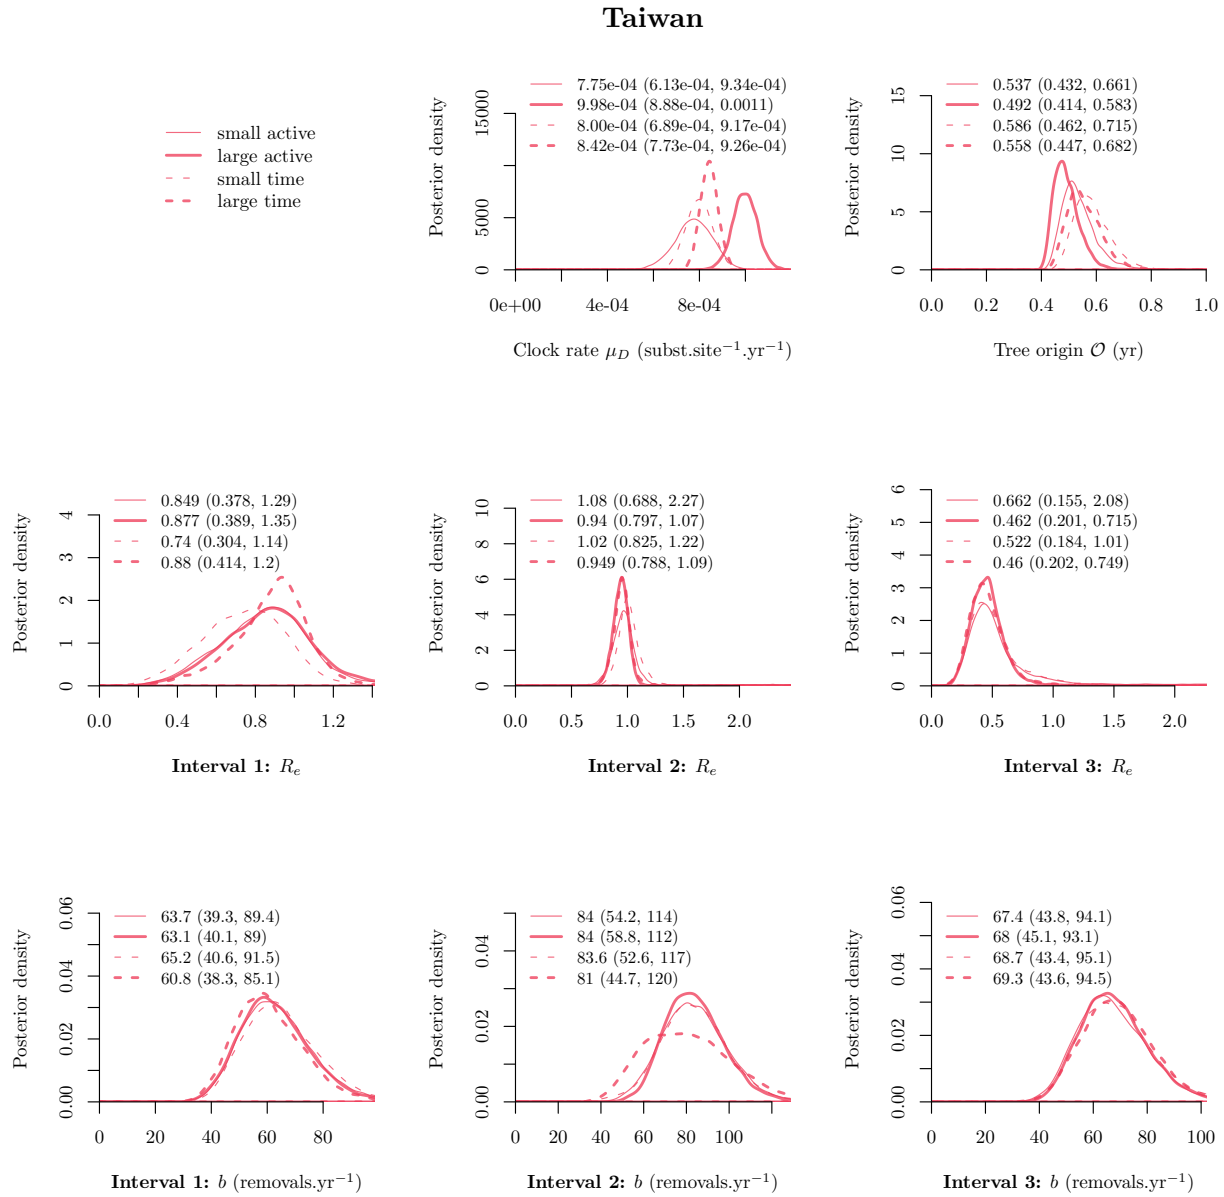

**Fig. S14:** Comparison of subsampling methods for Taiwan alignments. See Fig. S11 for further details.

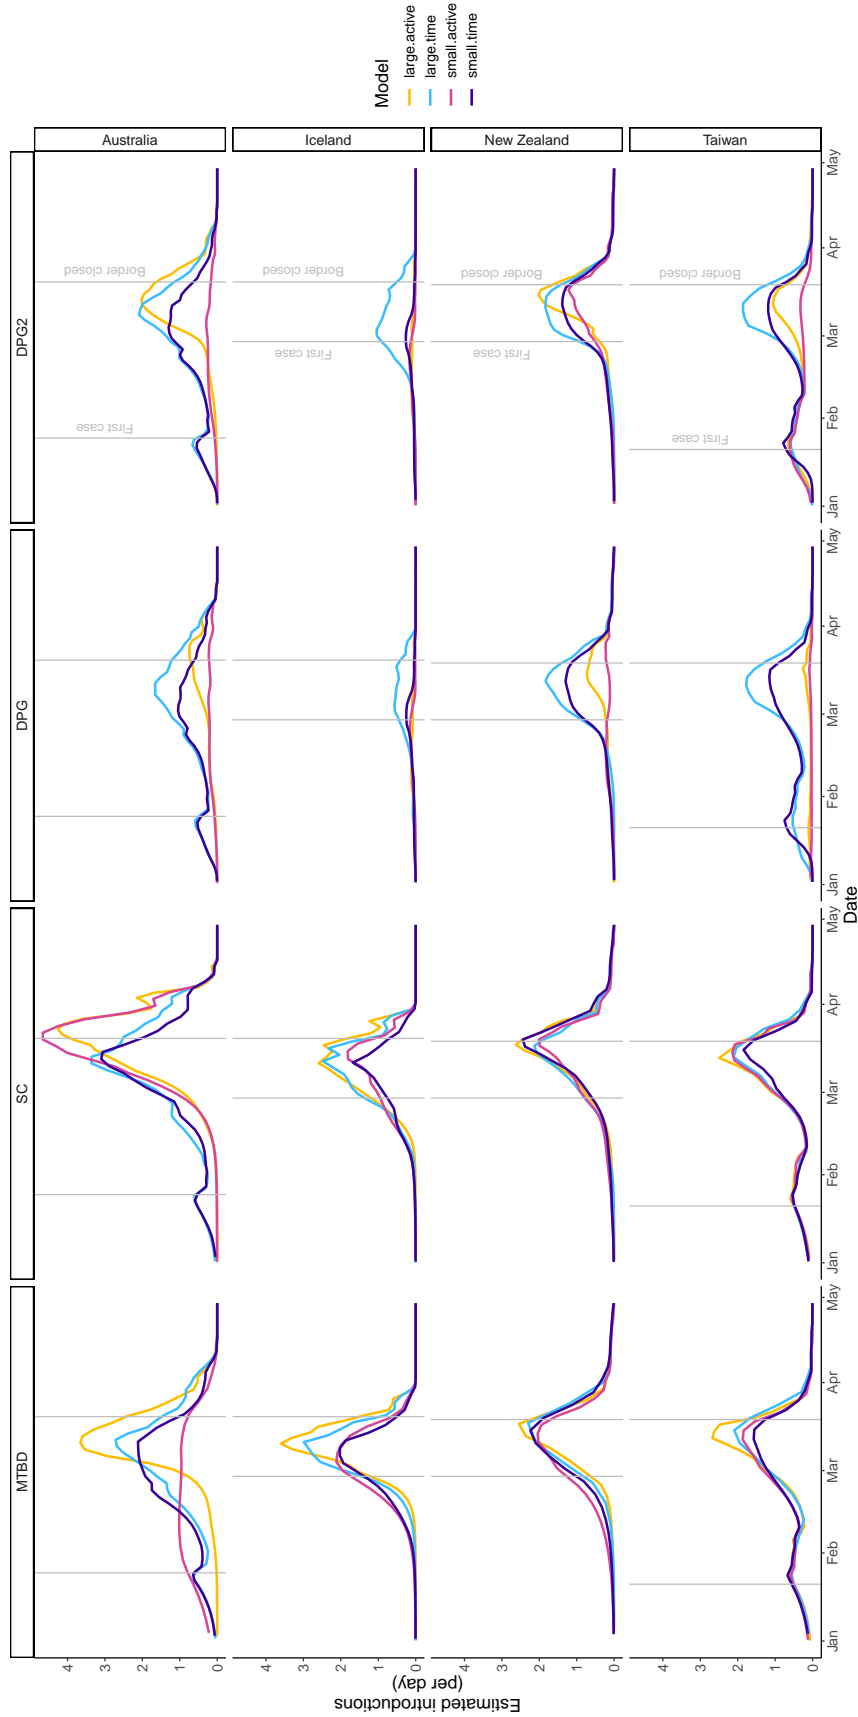

**Fig. S15:** Comparison of subsampling methods on SARS-CoV-2 introductions over time.

**Table S15:** Estimated number of imports and exports (mean and corresponding and 95% HPD intervals) into each target island deme  $\mathcal{IS}$  (using the “small-time” subsampling protocol). *Overseas (total)* assumes that the sample is representative of the total proportion of cases linked to overseas travel in Table S3. *Overseas (sample)* counts the number of samples that have been marked as having recent overseas travel in the GISAID sequence metadata Shu and McCauley (2017). These counts are likely influenced by missing data. Estimates are highlighted in bold if the expected number is within the 95% HPD interval of either of these two methods.

| Island $\mathcal{IS}$ | Model                    | Estimated imports | Estimated exports |
|-----------------------|--------------------------|-------------------|-------------------|
| New Zealand           | <i>Overseas (total)</i>  | 84                |                   |
|                       | <i>Overseas (sample)</i> | 49                |                   |
|                       | DPG                      | <b>41 [29,51]</b> | 14[5, 23]         |
|                       | DPG2                     | <b>41 [30,50]</b> | 11[4, 20]         |
|                       | SC                       | <b>58 [48,67]</b> | 0[0, 0]           |
|                       | MTBD                     | 63[54, 72]        | 1.4[0, 4]         |
| Australia             | <i>Overseas (total)</i>  | 159               |                   |
|                       | <i>Overseas (sample)</i> |                   |                   |
|                       | DPG                      | 49[33, 63]        | 34[17, 50]        |
|                       | DPG2                     | 52[38, 65]        | 31[16, 44]        |
|                       | SC                       | 98[83, 111]       | 0[0, 0]           |
|                       | MTBD                     | 87[72, 100]       | 0.68[0, 3]        |
| Iceland               | <i>Overseas (total)</i>  | 47                |                   |
|                       | <i>Overseas (sample)</i> | 68                |                   |
|                       | DPG                      | 6.9[6, 9]         | 36[26, 46]        |
|                       | DPG2                     | 7[5, 9]           | 43[32, 55]        |
|                       | SC                       | <b>37 [25,48]</b> | 0[0, 0]           |
|                       | MTBD                     | <b>49 [31,64]</b> | 0.95[0, 3]        |
| Taiwan                | <i>Overseas (total)</i>  | 99                |                   |
|                       | <i>Overseas (sample)</i> | 25                |                   |
|                       | DPG                      | 48[37, 58]        | 21[6, 36]         |
|                       | DPG2                     | 49[38, 58]        | 19[6, 32]         |
|                       | SC                       | 57[47, 68]        | 0[0, 0]           |
|                       | MTBD                     | 65[53, 76]        | 0.98[0, 4]        |

**Table S16:** Estimated imports and exports using the “large-time” method. See Table S15 caption for details.

| Island $IS$ | Model                    | Estimated imports | Estimated exports |
|-------------|--------------------------|-------------------|-------------------|
| New Zealand | <i>Overseas (total)</i>  | 84                |                   |
|             | <i>Overseas (sample)</i> | 49                |                   |
|             | DPG                      | <b>47 [39,55]</b> | 1.3[0, 4]         |
|             | DPG2                     | <b>48 [39,55]</b> | 2.3[0, 5]         |
|             | SC                       | <b>55 [47,64]</b> | 0[0, 0]           |
|             | MTBD                     | 60[50, 67]        | 0.52[0, 1]        |
| Australia   | <i>Overseas (total)</i>  | 159               |                   |
|             | <i>Overseas (sample)</i> |                   |                   |
|             | DPG                      | 68[55, 80]        | 47[27, 67]        |
|             | DPG2                     | 70[56, 80]        | 47[29, 64]        |
|             | SC                       | 110[100, 126]     | 0[0, 0]           |
|             | MTBD                     | 92[77, 104]       | 2.6[0, 9]         |
| Iceland     | <i>Overseas (total)</i>  | 47                |                   |
|             | <i>Overseas (sample)</i> | 68                |                   |
|             | DPG                      | 19[9, 27]         | 65[40, 87]        |
|             | DPG2                     | 28[18, 37]        | 54[31, 76]        |
|             | SC                       | <b>60 [49,68]</b> | 0[0, 0]           |
|             | MTBD                     | <b>62 [53,71]</b> | 0.7[0, 3]         |
| Taiwan      | <i>Overseas (total)</i>  | 99                |                   |
|             | <i>Overseas (sample)</i> | 25                |                   |
|             | DPG                      | 59[49, 66]        | 23[6, 40]         |
|             | DPG2                     | 60[50, 67]        | 29[15, 44]        |
|             | SC                       | 67[59, 74]        | 0[0, 0]           |
|             | MTBD                     | 69[60, 77]        | 0.93[0, 3]        |

**Table S17:** Estimated imports and exports using the “small-active” method. See Table S15 caption for details.

| Island $IS$ | Model                    | Estimated imports | Estimated exports |
|-------------|--------------------------|-------------------|-------------------|
| New Zealand | <i>Overseas (total)</i>  | 84                |                   |
|             | <i>Overseas (sample)</i> | 49                |                   |
|             | DPG                      | 13[7, 18]         | 41[29, 52]        |
|             | DPG2                     | <b>32 [9,49]</b>  | 20[1, 44]         |
|             | SC                       | <b>54 [43,62]</b> | 0[0, 0]           |
|             | MTBD                     | 64[55, 71]        | 0.13[0, 1]        |
| Australia   | <i>Overseas (total)</i>  | 159               |                   |
|             | <i>Overseas (sample)</i> |                   |                   |
|             | DPG                      | 14[8, 20]         | 68[52, 80]        |
|             | DPG2                     | 14[9, 19]         | 82[66, 96]        |
|             | SC                       | 120[99, 135]      | 0[0, 0]           |
|             | MTBD                     | 72[51, 91]        | 5.6[0, 17]        |
| Iceland     | <i>Overseas (total)</i>  | 47                |                   |
|             | <i>Overseas (sample)</i> | 68                |                   |
|             | DPG                      | 4.4[4, 6]         | 29[21, 36]        |
|             | DPG2                     | 4.6[4, 6]         | 68[49, 84]        |
|             | SC                       | <b>47 [36,60]</b> | 0[0, 0]           |
|             | MTBD                     | <b>57 [43,69]</b> | 0.28[0, 1]        |
| Taiwan      | <i>Overseas (total)</i>  | 99                |                   |
|             | <i>Overseas (sample)</i> | 25                |                   |
|             | DPG                      | 4.3[1, 10]        | 80[63, 98]        |
|             | DPG2                     | <b>26 [16,35]</b> | 90[68, 110]       |
|             | SC                       | 66[55, 77]        | 0[0, 0]           |
|             | MTBD                     | <b>69 [24,82]</b> | 11[0, 116]        |

**Table S18:** Estimated imports and exports using the “large-active” method. See Table S15 caption for details.

| Island $IS$ | Model                    | Estimated imports | Estimated exports |
|-------------|--------------------------|-------------------|-------------------|
| New Zealand | <i>Overseas (total)</i>  | 84                |                   |
|             | <i>Overseas (sample)</i> | 49                |                   |
|             | DPG                      | 22[11, 36]        | 48[13, 77]        |
|             | DPG2                     | 40[31, 48]        | 17[7, 26]         |
|             | SC                       | <b>58 [49,67]</b> | 0[0, 0]           |
|             | MTBD                     | <b>54 [42,65]</b> | 9.7[0, 20]        |
| Australia   | <i>Overseas (total)</i>  | 159               |                   |
|             | <i>Overseas (sample)</i> |                   |                   |
|             | DPG                      | 27[13, 43]        | 67[28, 101]       |
|             | DPG2                     | 50[35, 65]        | 38[19, 57]        |
|             | SC                       | 110[88, 120]      | 0.0012[0, 0]      |
|             | MTBD                     | 82[51, 112]       | 22[0, 75]         |
| Iceland     | <i>Overseas (total)</i>  | 47                |                   |
|             | <i>Overseas (sample)</i> | 68                |                   |
|             | DPG                      | 4.9[4, 7]         | 55[41, 69]        |
|             | DPG2                     | 5.1[4, 7]         | 100[66, 132]      |
|             | SC                       | <b>62 [48,74]</b> | 0[0, 0]           |
|             | MTBD                     | <b>65 [53,77]</b> | 1[0, 3]           |
| Taiwan      | <i>Overseas (total)</i>  | 99                |                   |
|             | <i>Overseas (sample)</i> | 25                |                   |
|             | DPG                      | 8.2[1, 16]        | 96[63, 126]       |
|             | DPG2                     | <b>40 [23,55]</b> | 120[60, 181]      |
|             | SC                       | 68[59, 77]        | 0[0, 0]           |
|             | MTBD                     | 72[63, 80]        | 0.8[0, 3]         |



## References

- Apple. 2020. Mobility trends reports. [Online on <https://www.apple.com/covid19/mobility>; posted on 25 May 2020].
- Bielejec, F., P. Lemey, G. Baele, A. Rambaut, and M. A. Suchard. 2014. Inferring heterogeneous evolutionary processes through time: from sequence substitution to phylogeography. *Syst. Biol.* 63:493–504.
- Bolger, A. M., M. Lohse, and B. Usadel. 2014. Trimmomatic: a flexible trimmer for illumina sequence data. *Bioinformatics* 30:2114–2120.
- Bouckaert, R., T. G. Vaughan, J. Barido-Sottani, S. Duchêne, M. Fourment, A. Gavryushkina, J. Heled, G. Jones, D. Kühnert, N. De Maio, et al. 2019. BEAST 2.5: An advanced software platform for bayesian evolutionary analysis. *PLoS Comput. Biol.* 15:e1006650.
- Bouckaert, R. R. and A. J. Drummond. 2017. bModelTest: Bayesian phylogenetic site model averaging and model comparison. *BMC Evol. Biol.* 17:42.
- Day, M. 2020a. COVID-19: four fifths of cases are asymptomatic, China figures indicate. *BMJ* 369:m1375.
- Day, M. 2020b. COVID-19: identifying and isolating asymptomatic people helped eliminate virus in Italian village. *BMJ* 368:m1165.
- Drummond, A. J., A. Rambaut, B. Shapiro, and O. G. Pybus. 2005. Bayesian coalescent inference of past population dynamics from molecular sequences. *Mol. Biol. Evol.* 22:1185–1192.
- Eden, J.-S., R. Rockett, I. Carter, H. Rahman, J. De Ligt, J. Hadfield, M. Storey, X. Ren, R. Tulloch, K. Basile, et al. 2020. An emergent clade of SARS-CoV-2 linked to returned travellers from Iran. *Virus Evol.* 6:veaa027.
- Freyman, W. A. and S. Höhna. 2019. Stochastic character mapping of state-dependent diversification reveals the tempo of evolutionary decline in self-compatible Onagraceae lineages. *Syst. Biol.* 68:505–519.
- Garrison, E. 2014. A C++ library for parsing and manipulating vcf files. [Online on <https://github.com/vcflib/vcflib>].
- Gelman, A. et al. 2006. Prior distributions for variance parameters in hierarchical models (comment on article by Browne and Draper). *Bayesian Anal.* 1:515–534.

- Grubaugh, N. D., K. Gangavarapu, J. Quick, N. L. Matteson, J. G. De Jesus, B. J. Main, A. L. Tan, L. M. Paul, D. E. Brackney, S. Grewal, et al. 2019. An amplicon-based sequencing framework for accurately measuring intrahost virus diversity using primaseq and ivar. *Genome Biol.* 20:1–19.
- Hadfield, J., C. Megill, S. M. Bell, J. Huddleston, B. Potter, C. Callender, P. Sagulenko, T. Bedford, and R. A. Neher. 2018. Nextstrain: real-time tracking of pathogen evolution. *Bioinformatics* 34:4121–4123.
- Hale, T., S. Webster, A. Petherick, T. Phillips, and B. Kira. 2020. Oxford COVID-19 government response tracker. Blavatnik School of Government. [Online on <https://github.com/OxCGRT/covid-policy-tracker>; posted on 4 June 2020].
- Hoffman, M. D. and A. Gelman. 2014. The No-U-Turn sampler: adaptively setting path lengths in Hamiltonian Monte Carlo. *J. Mach. Learn. Res.* 15:1593–1623.
- Katoh, K., G. Asimenos, and H. Toh. 2009. Multiple alignment of DNA sequences with MAFFT. Pages 39–64 *in* *Bioinformatics for DNA sequence analysis*. Springer.
- Kühnert, D., T. Stadler, T. G. Vaughan, and A. J. Drummond. 2016. Phylodynamics with migration: a computational framework to quantify population structure from genomic data. *Mol. Biol. Evol.* 33:2102–2116.
- Lai, A., A. Bergna, C. Acciarri, M. Galli, and G. Zehender. 2020. Early phylogenetic estimate of the effective reproduction number of SARS-CoV-2. *J. Med. Virol.* 92:675–679.
- Lemey, P., A. Rambaut, A. J. Drummond, and M. A. Suchard. 2009. Bayesian phylogeography finds its roots. *PLoS Comp. Biol.* 5.
- Li, R., S. Pei, B. Chen, Y. Song, T. Zhang, W. Yang, and J. Shaman. 2020a. Substantial undocumented infection facilitates the rapid dissemination of novel coronavirus (SARS-CoV-2). *Science* 368:489–493.
- Li, X., J. Zai, Q. Zhao, Q. Nie, Y. Li, B. T. Foley, and A. Chaillon. 2020b. Evolutionary history, potential intermediate animal host, and cross-species analyses of SARS-CoV-2. *J. Med. Virol.* 92:602–611.
- Loman, N., W. Rowe, and A. Rambaut. 2020. nCoV-2019 novel coronavirus bioinformatics protocol. [Online on <https://artic.network/ncov-2019/ncov2019-bioinformatics-sop.html>; posted on 23 January 2020].
- Lu, F. S., A. Nguyen, N. Link, and M. Santillana. 2020. Estimating the prevalence of COVID-19 in the United States: three complementary approaches. *medRxiv* .

- Müller, N. F. and R. Bouckaert. 2019. Coupled MCMC in BEAST 2. *bioRxiv* .
- Müller, N. F., D. Rasmussen, and T. Stadler. 2018. MASCOT: parameter and state inference under the marginal structured coalescent approximation. *Bioinformatics* 34:3843–3848.
- Nielsen, R. 2002. Mapping mutations on phylogenies. *Syst. Biol.* 51:729–39.
- Pearl, J. 1982. Reverend Bayes on inference engines: a distributed hierarchical approach. University of California, Los Angeles.
- Pupko, T., R. Shamir, and D. Graur. 2000. A fast algorithm for joint reconstruction of ancestral amino acid sequences. *Mol. Biol. Evol.* 17:890–896.
- Rambaut, A. 2020. Phylodynamic analysis | 176 genomes | 6 mar 2020. [Online on <http://virological.org/t/phylodynamic-analysis-176-genomes-6-mar-2020/356>; posted on 6 March 2020].
- Sagulenko, P., V. Puller, and R. A. Neher. 2018. TreeTime: Maximum-likelihood phylodynamic analysis. *Virus Evol.* 4.
- Salvatier, J., T. V. Wiecki, and C. Fonnesbeck. 2016. Probabilistic programming in Python using PyMC3. *PeerJ Comput. Sci.* 2:e55.
- Shu, Y. and J. McCauley. 2017. GISAID: Global initiative on sharing all influenza data – from vision to reality. *Euro. Surveill.* 22:30494.
- Yang, Z. 2014. *Molecular evolution: a statistical approach*. Oxford University Press.
